# Supplementary material for: Peripheral blood immune cell dynamics reflect antitumor immune responses and predict clinical response to immunotherapy
Source: HighWire-hosted journal article supplement (doi:10.1136/jitc-2022-004688), 2022-06-01
Supplement: jitc-2022-004688supp001_data_supplement.xlsx [file jitc-2022-004688supp001_data_supplement.xlsx]

## Sheet: S1
Supplemental Table S1. Patient Characteristics in the Metastatic NSCLC Cohort
Patient ID	Gender	Age	Race	Ethnicity	Smoking Status	No. of prior therapies	Prior cancer diagnosis	Prior RT	RT for other malignancy	RT for Lung Cancer	Histology	Stage at Diagnosis	Baseline Eosinophils (%)	Baseline Neutrophils (%)	Baseline Lymphocytes (%)	Baseline NLR	4 week Eosinophils (%)	4 week Neutrophils (%)	4 week Lymphocytes (%)	4 week NLR	1st Follow up Eosinophils (%)	1st Follow up Neutrophils (%)	1st Follow up Lymphocytes (%)	1st Follow up NLR	Response	Cohort
PT1	Male	69.926	Black	Not Hispanic/Latino	Former	1	Yes	Yes	Yes	Yes	SqCC	IIIA	2	65	24	2.76923	2	74	15	5.02778	0	81	10	7.86607	DCB	Testing
PT2	Male	62.5973	White	Not Hispanic/Latino	Current	3	No	No	No	No	SqCC	IIIB	2	68.7	19.2	3.59195	1.1	71.6	10.1	7.1087	1.9	68.7	14.8	4.63542	NDB	Testing
PT3	Male	52.6082	White	Not Hispanic/Latino	Current	4	No	Yes	No	Yes	SqCC	IV	0	87	1	108.778	0	92.7	0.4	254.5	0	96.6	0.6	150.429	NDB	Testing
PT4	Female	58.8712	Black	Not Hispanic/Latino	Former	2	No	Yes	No	Yes	SqCC	IIB	1.9	76	14.8	5.13675	1.3	80.5	9.2	8.74359	0	85.7	7.1	11.9882	NDB	Testing
PT5	Male	53.8247	White	Not Hispanic/Latino	Former	1	No	No	No	No	SqCC	IIB	2.1	72.5	13.9	5.19328	0	78	9	8	1.3	75.6	10.1	7.50476	DCB	Testing
PT6	Male	55.5479	White	Not Hispanic/Latino	Current	1	No	Yes	No	Yes	AC	IIIB	0.9	77.3	9.8	7.90625	1.8	73.3	13.6	5.38667	1.7	72.1	13	5.53333	DCB	Testing
PT7	Male	56.4658	White	Not Hispanic/Latino	Former	1	No	No	No	No	AC	IV	1	54	29.8	1.81223	1.2	21.5	59.3	0.378947	0	84	12.7	6.64384	DCB	Testing
PT8	Female	52.0685	Black	Not Hispanic/Latino	Former	2	Yes	Yes	Yes	Yes	AC	NA	0.7	57.4	30.3	1.89062	1.3	58.5	26.3	2.22695	1.5	58.5	24.7	2.37594	NDB	Testing
PT9	Female	44.9123	Black	Not Hispanic/Latino	Never	3	No	Yes	No	Yes	AC	IVB	2	53	38	1.4	2.8	50.6	38.1	1.33333	1.6	60.4	28.3	2.14019	NDB	Testing
PT10	Female	48.3479	White	Not Hispanic/Latino	Never	1	No	Yes	No	Yes	AC	IV	1.8	52.7	23.4	2.24675	2	77	12	7.14286	0.9	79.6	8.4	9.5	NDB	Testing
PT11	Female	73.5836	White	Not Hispanic/Latino	Former	1	No	Yes	No	Yes	AC	IV	6.2	49	36.7	1.33766	0.9	64.9	25.9	2.5	2.4	58.7	30.8	1.90196	DCB	Testing
PT12	Female	71.7644	White	Not Hispanic/Latino	Never	1	No	Yes	No	Yes	LCNEC	IIIA	1.2	67.1	23.8	2.81967	0	80.8	9.4	8.55696	0	80.8	9.4	8.55696	NDB	Testing
PT13	Female	57.5753	Black	Not Hispanic/Latino	Former	2	No	No	No	No	AC	IVB	4	52	33	1.52294	1	45	43	1.04839	6.5	36.9	41.1	0.894737	DCB	Testing
PT14	Female	61.9589	White	Hispanic/Latino	Never	3	No	Yes	No	Yes	AC	IIIB/IV	3.8	51.8	33.1	1.56604	4.6	55.7	26.7	2.08621	4.6	55.7	26.7	2.08621	NDB	Testing
PT15	Male	60.7068	White	Not Hispanic/Latino	Former	1	Yes	Yes	No	Yes	AC	IV	2	68	17	3.93684	1	66	21	3.14414	2	67	19	3.44565	NDB	Testing
PT16	Female	68.2301	White	Not Hispanic/Latino	Former	1	No	No	No	No	AC	IV	67.8	22.5	3.6	6.12022	23.4	61.6	6.6	9.31724	11.4	73.8	6.9	10.7353	NDB	Testing
PT17	Male	56.3863	White	Not Hispanic/Latino	Never	1	Yes	Yes	Yes	Yes	AC	IV	0.6	76.7	13.7	5.61538	4	67.3	11.3	5.92593	3.5	69.7	11.4	6.11765	DCB	Testing
PT18	Male	62.1836	Black	Not Hispanic/Latino	Never	1	No	Yes	No	Yes	AC	IV	0.5	46.2	43.2	1.07368	1.5	71.5	13.4	5.32857	0	82.4	12	6.85	NDB	Testing
PT19	Male	58.3753	White	Not Hispanic/Latino	Former	4	No	Yes	No	Yes	SqCC	IIB	2	71.7	8.8	8.10526	4.6	65.9	17.8	3.69892	2.8	71.4	14.4	4.97561	DCB	Testing
PT20	Female	70.6411	White	Not Hispanic/Latino	Former	1	No	No	No	No	AC	IIB	5.1	52.3	30.1	1.7375	6.6	54.9	24	2.28455	2.9	53.1	30.2	1.76331	DCB	Testing
PT21	Male	58.1096	White	Hispanic/Latino	Former	2	No	Yes	No	Yes	SqCC	IIIA	6	52.2	28.3	1.84091	3.1	63.1	25.6	2.45349	4.9	53.2	30.2	1.75758	DCB	Testing
PT22	Female	62.5452	White	Not Hispanic/Latino	Former	1	Yes	Yes	No	Yes	SqCC	IIIA	2.7	79.6	9	8.78571	1.4	75.9	9.5	8.03704	1.4	75.9	9.5	8.03704	NDB	Testing
PT23	Male	87.0192	White	Not Hispanic/Latino	Former	0	No	No	No	No	AC	IVA	1.6	67.3	19.5	3.44444	2.6	62.9	22.9	2.75275	3.9	59.9	23	2.60588	DCB	Testing
PT24	Male	42.0438	White	Not Hispanic/Latino	Former	0	Yes	Yes	No	Yes	AC	IVB	1.9	65.3	8.7	7.52439	3.8	65.8	10.5	6.25275	2.2	75.3	6	12.5538	DCB	Testing
PT25	Female	75.2575	White	Not Hispanic/Latino	Former	1	No	Yes	No	Yes	SqCC	IIIA	1	81	9	9.50667	2	77	9	8.79104	1	81	8	10.6102	DCB	Testing
PT26	Male	71.6685	White	Not Hispanic/Latino	Former	1	No	Yes	No	Yes	SqCC	IIIC	5.3	72	10.9	6.62745	0	55	24	2.25	0	55	24	2.25	NDB	Testing
PT27	Male	80.6466	White	Not Hispanic/Latino	Former	1	No	No	No	No	AC	IIA	4.5	52.6	30.9	1.70142	6	60.3	22.7	2.65318	7.1	51.3	31	1.65401	DCB	Testing
PT28	Female	61.1233	Black	Not Hispanic/Latino	Former	0	Yes	Yes	No	Yes	AC	IIIA	7	79	6	12.8413	2	83	6	14.8052	2	80	7	12.274	NDB	Testing
PT29	Female	75.1726	White	Not Hispanic/Latino	Former	0	Yes	No	No	No	AC	IV	12.5	60.1	9	6.70909	1.3	82.5	17.8	3.50704	2.7	69.1	9.4	7.34286	DCB	Testing
PT30	Female	56.4712	Black	Not Hispanic/Latino	Former	3	No	Yes	No	Yes	AC	IV	0	69	23	3.04678	2	65	19	3.40909	4	59	24	2.46199	NDB	Testing
PT31	Male	73.9973	White	Not Hispanic/Latino	Former	1	No	No	No	No	Other	IV	4.2	51.5	28.7	1.79612	4.4	60.5	19	3.19	3.2	62.7	16.2	3.87356	DCB	Testing
PT32	Male	53.5836	Black	Not Hispanic/Latino	Former	3	Yes	Yes	Yes	Yes	SqCC	NA	3	69	13	5.44	4	73	10	7.075	4	72	11	6.5122	DCB	Testing
PT33	Female	60.9123	White	Not Hispanic/Latino	Never	2	Y	Yes	No	Yes	Other	IV	1	66	19	3.5	2	67	18	3.67308	2	74	14	5.30612	DCB	Testing
PT34	Female	53.6411	Black	Not Hispanic/Latino	Former	1	No	Yes	No	Yes	AC	IIIA	6	47	40	1.17582	1	63	24	2.59091	2	53	31	1.71038	DCB	Testing
PT35	Female	56.6986	White	Not Hispanic/Latino	Former	1	No	No	No	No	AC	IIIA	2	57	31	1.83051	5	73	13	5.83544	4	79	8	9.32468	NDB	Testing
PT36	Female	44.1945	White	Not Hispanic/Latino	Never	1	No	Yes	No	Yes	AC	IV	3.6	47.6	26.8	1.77612	5.1	63	16.1	3.90909	4.6	64.7	17.5	3.68675	NDB	Testing
PT37	Male	63.9425	White	Hispanic/Latino	Former	2	Yes	Yes	Yes	Yes	LCNEC	IIIB	1.9	74.4	14.5	5.13333	0.4	66.9	24.3	2.75954	0.4	66.9	24.3	2.75954	NDB	Testing
PT38	Male	67.3699	White	Not Hispanic/Latino	Never	1	No	No	No	No	SqCC	IV	2.4	62.6	27.1	2.30667	3.3	66	18.8	3.50877	4.9	69.8	16.1	4.33071	DCB	Testing
PT39	Female	58.7123	White	Not Hispanic/Latino	Never	2	No	Yes	No	Yes	AC	IIIA	2.3	59.7	20	2.99107	0.7	76.2	11.8	6.43871	0.7	76.2	11.8	6.43871	NDB	Testing
PT40	Male	59.7096	Asian	Not Hispanic/Latino	Never	2	No	Yes	No	Yes	SqCC	IV	7.6	64.5	11.9	5.43396	8.3	74.8	5.8	12.8545	9.4	76.2	6	12.7778	NDB	Testing
PT41	Male	52.8712	White	Not Hispanic/Latino	Never	2	No	No	No	No	AC	IV	NA	NA	NA	NA	NA	NA	NA	NA	NA	NA	NA	NA	NDB	Testing
PT42	Male	49.7014	White	Not Hispanic/Latino	Current	2	No	Yes	No	Yes	AC	IV	NA	NA	NA	NA	NA	NA	NA	NA	NA	NA	NA	NA	NDB	Testing
PT43	Female	64.4164	White	Not Hispanic/Latino	Former	1	No	Yes	No	Yes	AC	IVB	0.4	58.9	26.6	2.21212	0	84.7	7.1	11.9459	2.4	83.4	6	13.825	NDB	Testing
PT44	Female	65.8192	White	Not Hispanic/Latino	Former	1	No	No	No	No	AC	IV	2.4	61.5	26.6	2.31298	1.8	46.4	41.6	1.12121	1.1	58.2	31.5	1.85075	DCB	Testing
PT45	Female	65.8082	Black	Not Hispanic/Latino	Current	1	No	No	No	No	SqCC	IA	5.6	52.4	35.1	1.49153	3.7	53.8	31	1.73729	1.8	58.2	32.4	1.79861	DCB	Testing
PT46	Male	55.0274	White	Not Hispanic/Latino	Former	2	No	Yes	No	Yes	AC	IIIA	0	89	3	30	2.7	74.8	7.1	10.566	6.9	68.3	9.6	7.14943	DCB	Testing
PT47	Female	82.3836	White	Not Hispanic/Latino	Former	0	Yes	Yes	No	Yes	AC	IA	4.1	62.6	21.4	2.91566	n/a	n/a	n/a		0.1	75.9	17.2	4.42857	NDB	Testing
PT48	Male	62.2822	White	Not Hispanic/Latino	Former	0	No	No	No	No	AC	IV	0.5	73.7	17.7	4.17105	0.4	68.9	19.3	3.56618	0.6	86.3	7	12.3977	NDB	Testing
PT49	Female	72.2877	Asian	Not Hispanic/Latino	Never	1	No	No	No	No	AC	IV	3.1	68.4	20	3.42336	0	88	7.8	11.3077	0	94.8	3.1	30.475	NDB	Testing
PT50	Male	62.8411	White	Not Hispanic/Latino	Former	0	No	Yes	No	Yes	SqCC	IV	1	71.6	14.4	4.96685	2.8	67.9	16.4	4.13706	2.6	66.5	18.8	3.53125	NDB	Testing
PT51	Male	76.5479	White	Not Hispanic/Latino	Former	0	No	No	No	No	SqCC	IV	0.2	82.8	8.8	9.35417	2.1	81.4	8.6	9.51389	2.5	76.6	11.9	6.44944	DCB	Testing
PT52	Male	81.2219	White	Not Hispanic/Latino	Former	1	Yes	No	No	No	AC	IIIA	1.5	75.6	11.8	6.40625	1.9	76.5	9.1	8.39759	3	72	12	6.19792	NDB	Testing
PT53	Male	65.8767	White	Not Hispanic/Latino	Former	1	No	Yes	No	Yes	SqCC	IIIA	1.1	75.9	8	9.54545	1.2	79.3	8.8	9	2.5	73.7	10.8	6.8374	NDB	Testing
PT54	Female	65.0521	White	Not Hispanic/Latino	Former	1	No	Yes	No	Yes	AC	IB	2.8	76.7	14.2	5.38824	3.5	72.6	16.3	4.47692	3.5	74	15.6	4.74638	DCB	Testing
PT55	Male	73.7315	White	Not Hispanic/Latino	Never	0	No	No	No	No	AC	IV	0.4	90.5	5.6	16.0426	2	74.7	11.5	6.50495	0.3	92.1	5.3	17.5312	NDB	Testing
PT56	Male	78.6548	White	Not Hispanic/Latino	Former	1	Yes	No	No	No	AC	IV	0	83.5	5.2	16.093	2.7	79.3	9	8.78889	0.1	85.5	4.9	17.3333	NDB	Testing
PT57	Female	67.6027	White	Not Hispanic/Latino	Former	1	Yes	No	No	No	Other	IV	1	60	31	2	0	79.1	8.8	9.01905	2	68	21	3.35714	NDB	Testing
PT58	Male	71.0301	White	Not Hispanic/Latino	Former	1	No	No	No	No	AC	IV	2.1	62.1	24.2	2.56388	2.6	69	19.6	3.53043	4.9	58	24.3	2.38206	NDB	Testing
PT59	Female	66.0466	White	Not Hispanic/Latino	Never	3	No	No	No	No	AC	IIB	3.8	70.8	16.4	4.31944	2.5	61.9	24.6	2.51479	3.6	53	32.1	1.64706	DCB	Testing
PT60	Female	50.6822	White	Not Hispanic/Latino	Former	0	Yes	No	No	No	LCNEC	IIB	0.2	79.9	10.2	7.86047	3.5	70.3	17.3	4.05556	2.6	66.5	20.9	3.17391	DCB	Testing
PT61	Male	60.411	White	Not Hispanic/Latino	Former	1	No	Yes	No	Yes	AC	IV	0.5	70.1	20.7	3.38068	6.6	65.3	19.7	3.31818	9.6	50.5	30	1.68571	DCB	Testing
PT62	Female	63.8082	White	Not Hispanic/Latino	Former	0	Yes	No	No	No	AC	IV	2.6	53.9	32.8	1.64417	5	54.9	28.7	1.90977	5.8	61.8	17.5	3.52055	DCB	Testing
PT63	Female	73.6466	White	Not Hispanic/Latino	Current	0	No	No	No	No	SqCC	IIIB	1.8	55	34	1.61304	2.2	68.7	23.1	2.97253	1.4	68.8	24.2	2.85106	DCB	Testing
PT64	Male	48.0438	White	Not Hispanic/Latino	Never	0	No	No	No	No	AC	IV	2.3	63.7	25.3	2.51748	5.5	64	23.8	2.68539	4.2	64.7	23.2	2.78873	NDB	Testing
PT65	Female	72.6932	White	Not Hispanic/Latino	Former	1	Yes	Yes	No	Yes	AC	IIA	0.1	75.2	15.2	4.94355	0.9	77.8	10.8	7.21176	0.2	85.9	7.6	11.1895	NDB	Testing
PT66	Female	53.7041	White	Not Hispanic/Latino	Never	2	No	Yes	No	Yes	AC	IV	0.8	68.1	24.7	2.75132	0	88.8	3.3	26.8983	0	88.8	3.3	26.8983	NDB	Testing
PT67	Female	64.0658	White	Not Hispanic/Latino	Current	0	No	Yes	No	Yes	AC	IV	0.4	60.5	33.1	1.82374	0	54	40	1.38462	0	57	36	1.58621	DCB	Testing
PT68	Male	76.7096	White	Not Hispanic/Latino	Former	1	No	Yes	No	Yes	SqCC	IIIB	1.3	83.9	8.6	9.80392	2.1	79.8	10.2	7.83673	5.9	73.6	9	8.19672	NDB	Testing
PT69	Female	54.1644	Black	Not Hispanic/Latino	Former	1	No	Yes	No	Yes	SqCC	IIIA	4	69	18	3.36957	3	79	12	5.75	0.7	63.7	27.8	2.29204	NDB	Testing
PT70	Male	79.4329	Black	Not Hispanic/Latino	Former	1	No	No	No	No	AC	IV	4.5	62.4	19	3.28495	0	71	15	4.74576	0	60.6	26.4	2.29932	NDB	Testing
PT71	Female	55.3123	White	Not Hispanic/Latino	Former	0	No	No	No	No	AC	IV	1.4	80	12.6	6.35484	0.8	81.2	12.4	6.5375	0.8	81.2	12.4	6.5375	NDB	Testing
PT72	Female	62.811	White	Not Hispanic/Latino	Former	1	Yes	Yes	No	Yes	AC	IV	4.3	69.7	14.5	4.81667	6.6	76.5	7.1	10.8293	3.6	77.8	8.4	9.31667	NDB	Testing
PT73	Male	84.4822	White	Not Hispanic/Latino	Former	0	Yes	No	No	No	AC	IV	0.9	82.4	10.2	8.03788	0.4	90.8	6.1	14.9412	0.9	85.5	8.1	10.6134	NDB	Testing
PT74	Female	55.8027	Black	Not Hispanic/Latino	Current	0	No	No	No	No	AC	IV	3.5	72.2	16.7	4.335	1.8	70.5	20.2	3.49462	2.2	68.2	18.6	3.67296	DCB	Testing
PT75	Female	68.9534	Black	Not Hispanic/Latino	Current	0	No	No	No	No	AC	IV	5.2	60.7	27.7	2.19718	5.4	55.5	31.5	1.76211	3.9	54.5	34.6	1.56985	DCB	Testing
PT76	Male	74.7616	Asian	Not Hispanic/Latino	Former	0	No	Yes	No	Yes	AC	IV	0.6	61.9	27.4	2.26809	1.6	55.5	29.3	1.89116	1.6	55.5	29.3	1.89116	DCB	Testing
PT77	Female	67.0603	White	Not Hispanic/Latino	Former	1	No	No	No	No	AC	IIA	4.6	63.9	17.4	3.68085	0.8	78.8	8.9	8.8375	0.9	79.7	10.4	7.66667	DCB	Testing
PT78	Male	71.7479	White	Not Hispanic/Latino	Former	1	No	No	No	No	AC	IIA	2.5	63.8	19.6	3.26582	n/a	n/a	n/a		4.8	67.1	18.3	3.66452	DCB	Testing
PT79	Male	57.337	White	Not Hispanic/Latino	Former	1	No	Yes	No	Yes	AC	IV	0.7	79.1	8.2	9.575	0	75.4	10.6	7.10233	0.2	65.1	16.5	3.94898	DCB	Testing
PT80	Female	63.4932	White	Not Hispanic/Latino	Current	1	Yes	Yes	Yes	No	AC	IV	6	69.1	13.4	5.1625	0	80.9	9.9	8.18966	2	62.1	18.8	3.31343	DCB	Testing
PT81	Male	53.0247	White	Not Hispanic/Latino	Former	2	No	Yes	No	Yes	SqCC	IV	3.3	71.1	14.9	4.78125	2.6	73.7	14.2	5.17021	3.2	69.1	15.6	4.42529	DCB	Testing
PT82	Male	68.2411	White	Not Hispanic/Latino	Former	0	No	No	No	No	AC	IV	8	73.3	10.2	7.17692	13.5	56.6	16.7	3.40678	7.1	66.7	14.3	4.65714	NDB	Testing
PT83	Female	62.7616	Black	Not Hispanic/Latino	Former	1	Yes	Yes	No	Yes	SqCC	IIIB	1.3	79	8.3	9.5	0.1	90.9	2.4	38.1111	0.1	90.9	2.4	38.1111	NDB	Testing
PT84	Male	68.2	White	Not Hispanic/Latino	Former	0	No	No	No	No	AC	IV	3	66.9	21.8	3.06037	3.6	63.2	20.4	3.10502	4.5	63	22.2	2.84252	DCB	Testing
PT85	Female	47.9014	White	Not Hispanic/Latino	Former	1	No	Yes	No	Yes	AC	IIIA	3.6	60.1	23.2	2.59259	0.2	64.9	22.9	2.84173	0.2	68.9	18.1	3.79487	DCB	Testing
PT86	Female	90.4521	White	Not Hispanic/Latino	Former	0	No	Yes	No	Yes	AC	IIIA	1.6	76.3	13.5	5.65385	2.1	78.5	11.6	6.75	1.9	81.5	10.1	8.04286	DCB	Testing
PT87	Female	59.0247	Black	Not Hispanic/Latino	Former	2	Yes	Yes	No	Yes	AC	IIIA	2.2	68.3	22	3.11607	0	84.7	10.6	8.0339	0.5	80.1	13.1	6.11392	DCB	Testing
PT88	Male	60.0247	Black	Not Hispanic/Latino	Former	0	Yes	No	No	No	AC	IIB	2.4	56.3	30.3	1.85937	2.3	64.5	23.7	2.72444	4.2	56.5	29.1	1.94332	NDB	Testing
PT89	Male	59.3288	Black	Not Hispanic/Latino	Never	5	No	Yes	No	Yes	Other	IV	0.8	64.3	22.3	2.88426	0.8	63.5	18.9	3.368	3.5	65.2	15.6	4.1828	NDB	Testing
PT90	Male	65.3178	White	Not Hispanic/Latino	Current	0	No	Yes	No	Yes	AC	IV	2.7	63.6	20.8	3.06471	3.9	59.3	20.6	2.8855	1.3	59.8	20.9	2.86813	NDB	Testing
PT91	Female	58.663	Asian	Not Hispanic/Latino	Never	3	No	No	No	No	AC	IV	2.6	59.8	28.7	2.08276	1.6	62	26.8	2.31148	1.6	62.4	26.8	2.32215	NDB	Testing
PT92	Female	68.6466	Black	Not Hispanic/Latino	Former	1	No	No	No	No	AC	IV	3.1	56.8	32	1.77124	0.3	71.5	20	3.56452	4.8	56.1	27.4	2.048	NDB	Testing
PT93	Female	74.4055	White	Not Hispanic/Latino	Former	2	No	Yes	No	Yes	AC	IIIA	2.4	62.7	26.9	2.33649	1.8	74.1	14.1	5.23864	1.7	78.1	11.4	6.81013	DCB	Testing
PT94	Female	45.1726	Black	Not Hispanic/Latino	Never	0	No	No	No	No	SqCC	IV	0.5	70.2	21	3.35165	1.9	69.8	20	3.47674	2.7	68.8	19.5	3.52941	NDB	Testing
PT95	Male	68.6274	White	Not Hispanic/Latino	Former	3	No	No	No	No	AC	IV	6.4	65.4	14.8	4.41837	6.1	66.1	15.2	4.35632	6.7	62.5	15.9	3.92941	NDB	Testing
PT96	Male	64.5507	White	Not Hispanic/Latino	Former	2	No	Yes	No	Yes	AC	IV	5.4	79.2	6.5	12.0833	5.5	80.4	4	20.2308	5.5	80.4	4	20.2308	NDB	Testing
PT97	Female	64.5836	White	Not Hispanic/Latino	Never	0	Yes	Yes	Yes	No	AC	IIIB	0.3	73.8	16.2	4.55085	5.1	53	24.1	2.21053	3.4	66	22.9	2.875	DCB	Testing
PT98	Male	85.8658	White	Not Hispanic/Latino	Former	1	Yes	No	No	No	AC	IIIB	0	88	2.8	31.2609	1	73.5	19.5	4	1.2	72.5	17.3	4.18868	NDB	Testing
PT99	Female	64.9781	White	Not Hispanic/Latino	Never	3	Yes	No	No	No	AC	IV	0	88	8.4	10.4211	5.8	68.5	14.1	4.86316	0	86.6	9	9.6194	NDB	Testing
PT100	Female	80.1068	White	Not Hispanic/Latino	Former	1	Yes	Yes	Yes	No	SqCC	IV	1.1	67.6	22.9	2.94495	0.3	76.3	12	6.36986	1.8	69.9	18.8	3.72889	DCB	Testing
PT101	Male	62.9205	White	Not Hispanic/Latino	Never	4	No	Yes	No	Yes	AC	IV	3	66.2	21.2	3.12903	0.8	80.4	9.4	8.53608	0.8	80.4	9.4	8.53608	NDB	Testing
PT102	Male	80.5699	White	Not Hispanic/Latino	Former	1	Yes	Yes	No	Yes	AC	IV	0.6	88.9	5.3	16.7292	0.3	93.9	2.1	44.9375	0.3	93.9	2.1	44.9375	NDB	Testing
PT103	Female	60.526	White	Not Hispanic/Latino	Former	1	No	Yes	No	Yes	AC	IV	1.4	63.6	24	2.65049	0.6	66.5	23.3	2.85603	0.6	63.1	22.7	2.77723	NDB	Testing
PT104	Male	77.3096	White	Not Hispanic/Latino	Never	0	No	No	No	No	Other	II	0	87.5	7.3	11.9844	0	61.5	21.8	2.82418	0	57.5	22.3	2.57647	DCB	Testing
PT105	Female	49.4219	White	Not Hispanic/Latino	Former	1	No	Yes	No	Yes	AC	IV	0.2	82.7	7.9	10.4175	0.1	82.6	7.9	10.4961	0.3	82.1	10.3	8	NDB	Testing
PT106	Male	48.0767	Black	Not Hispanic/Latino	Never	1	No	Yes	No	Yes	AC	IV	0	78.1	9.7	8.02667	0.3	72.3	13.3	5.43269	0.3	72.3	13.3	5.43269	NDB	Testing
PT107	Male	70.9233	White	Not Hispanic/Latino	Former	1	No	No	No	No	AC	IV	0	76.7	12.3	6.22727	0	72.6	13.9	5.20588	0	81.5	10.3	7.89796	NDB	Testing
PT108	Female	59.5425	White	Not Hispanic/Latino	Former	1	No	Yes	No	Yes	SqCC	IIB	2.3	70	16.7	4.19318	3.2	81.6	7.6	10.78	NA	NA	NA	NA	NDB	Testing
PT109	Male	77.7041	White	Not Hispanic/Latino	Former	0	Yes	Yes	Yes	No	Other	IV	0.3	82.9	7.3	11.3375	0.2	73	12.5	5.80952	0	79	6.4	12.2593	NDB	Testing
PT110	Female	69.7479	White	Not Hispanic/Latino	Never	1	Yes	Yes	Yes	Yes	SqCC	IIIB	2.6	66.1	10.9	6.07143	4	75	7.5	10.0638	4	75	7.5	10.0638	NDB	Testing
PT111	Male	78.0849	White	Not Hispanic/Latino	Former	1	Yes	Yes	No	Yes	SqCC	NA	4	65	10	4.17	4.9	66.7	16.9	4.07692	1.5	72	15.1	4.78626	NDB	Testing
PT112	Male	67.4932	White	Not Hispanic/Latino	Former	1	Yes	Yes	No	Yes	AC	1a	4.1	70	10.4	6.73684	3.1	68.1	15.4	4.40625	5.3	72.2	9.7	7.43333	DCB	Testing
PT113	Female	70.8329	Black	Not Hispanic/Latino	Former	1	Yes	No	No	No	LCNEC	IIB	1.2	70.6	17.3	4.07759	0.4	73.1	18.3	4.16667	0.9	66.1	19.7	3.34906	NDB	Testing
PT114	Male	60.7233	White	Not Hispanic/Latino	Current	1	No	Yes	No	Yes	SqCC	IIIB	0.1	79.3	7.3	10.9434	0.6	65	21.7	3	0.5	75.3	15.8	4.76623	DCB	Testing
PT115	Female	78.2712	White	Not Hispanic/Latino	Former	6	Yes	Yes	No	Yes	AC	IV	4.9	73.3	10.6	6.91304	4	68	16	4.3	0	76	13	6.125	NDB	Testing
PT116	Female	70.3945	White	Not Hispanic/Latino	Never	0	No	No	No	No	AC	IV	3.6	62.5	19.9	3.1413	3.4	76.3	11.8	6.5	2.8	75.1	8.1	9.27778	NDB	Testing
PT117	Male	72.4164	White	Not Hispanic/Latino	Former	0	Yes	Yes	No	Yes	AC	IV	5.2	73.7	12	6.11429	17.6	59.7	12.7	4.625	23.5	52	14.3	3.6	DCB	Testing
PT118	Male	72.4274	White	Not Hispanic/Latino	Former	0	Yes	No	No	No	AC	IV	0.1	90.2	6.4	14.0808	0.1	85.7	9.9	8.66327	0	83.2	10.6	7.86	DCB	Testing
PT119	Male	78.9096	Black	Not Hispanic/Latino	Former	1	No	Yes	No	Yes	SqCC	IIIA	2.1	69	16.4	4.19718	4.1	62	19.7	3.14634	5.9	67.8	13.5	5.03774	DCB	Testing
PT120	Female	74.5452	White	Not Hispanic/Latino	Former	1	Yes	Yes	Yes	Yes	AC	IA	1.6	76.7	10.7	7.19178	0.7	76.3	12.1	6.28261	1.7	72	14.6	4.91346	NDB	Testing
PT121	Female	54.6767	White	Not Hispanic/Latino	Former	1	No	Yes	No	Yes	AC	IA	2.8	65.9	22.7	2.90385	0.3	79.3	13.4	5.93478	0.3	79.3	13.4	5.93478	NDB	Testing
PT122	Male	74.1452	White	Not Hispanic/Latino	Former	1	No	Yes	No	Yes	Other	IIIA	2.7	68.2	12.7	5.37097	0	74	16	4.62222	0.4	87.6	7.7	11.4342	DCB	Testing
PT123	Male	63.5644	Black	Not Hispanic/Latino	Former	1	No	No	No	No	AC	IV	0.9	40.2	41	0.978166	5	37.8	40.7	0.929577	4.3	49.7	33.5	1.47867	DCB	Testing
PT124	Male	58.9397	White	Not Hispanic/Latino	Former	0	No	No	No	No	AC	IIIA	4.7	73	7.4	9.81395	6.8	69.4	7.7	9.06383	NA	NA	NA	NA	NDB	Testing
PT125	Male	69.9205	White	Not Hispanic/Latino	Former	2	No	No	No	No	Other	IIIA	0	87.1	4	22.0345	0.9	78.3	8.4	9.36111	0	91.9	3.3	27.6176	NDB	Testing
PT126	Male	78.6027	White	Not Hispanic/Latino	Former	0	Yes	Yes	Yes	Yes	AC	IB	1.3	71.4	17.2	4.13761	1.3	68	20.6	3.30275	2	62.6	24.1	2.60185	DCB	Testing
PT127	Male	74.4438	White	Not Hispanic/Latino	Former	0	Yes	Yes	No	Yes	AC	IB	2.7	66.5	18.1	3.66929	3	58.6	25.7	2.28333	3.9	52.6	32.9	1.5988	NDB	Testing
PT128	Male	65.2986	White	Not Hispanic/Latino	Never	1	No	Yes	No	Yes	AC	1A	0.5	70.3	14.2	4.92727	3.2	70	12.3	5.425	3.9	73.5	9.4	7.77778	DCB	Testing
PT129	Male	70.0247	Unknown	Not Hispanic/Latino	Former	0	No	No	No	Yes	AC	IV	0	73.2	16.9	4.33607	0	67.7	21.2	3.19084	0	60.9	25.8	2.36364	DCB	Testing
PT130	Female	53.1671	White	Not Hispanic/Latino	Former	1	No	Yes	No	Yes	AC	IIIA	4	78	11	7	5.1	70.3	12.5	5.63014	2	85	10	8.54545	NDB	Testing
PT131	Female	58.5781	Black	Not Hispanic/Latino	Former	1	No	Yes	No	Yes	AC	IIIB	2.1	51.9	20.2	2.56522	0.4	85	4.2	20.25	0.7	88	2.8	31.3099	NDB	Testing
PT132	Male	75.7233	White	Not Hispanic/Latino	Never	1	No	No	No	No	AC	IV	0	90.3	4.9	18.5075	0.1	88.5	2.6	34.2128	0.9	81.1	3.7	22	NDB	Testing
PT133	Female	55.811	White	Not Hispanic/Latino	Former	1	Yes	Yes	Yes	Yes	AC	IIIB	0.1	76.5	14.1	5.4252	0.5	68.5	15.8	4.30108	0	88.6	6.8	13.1379	DCB	Testing
PT134	Female	59.1425	White	Not Hispanic/Latino	Former	1	Yes	Yes	Yes	Yes	AC	IA	0	95.8	2	48.75	0	92.6	3.9	23.92	0	75.6	8.2	9.26316	NDB	Testing
PT135	Female	46.9644	White	Not Hispanic/Latino	Never	1	No	Yes	No	Yes	AC	IV	0.2	86.5	4.7	18.431	0	77.9	10.3	6.5	0	82.6	7.6	9.475	DCB	Testing
PT136	Male	83.7699	White	Not Hispanic/Latino	Former	0	No	No	No	No	SqCC	IV	1	75	13	5.53846	2	72	16	4.58824	1.6	71.4	13.5	5.27434	NDB	Testing
PT137	Female	53.9452	Black	Not Hispanic/Latino	Current	0	No	Yes	No	Yes	AC	IV	2	75.5	15.6	4.83929	0.1	56.3	27.9	2.01	0.1	84.9	10.3	8.2069	NDB	Testing
PT138	Female	61.5753	White	Not Hispanic/Latino	Former	0	No	Yes	No	Yes	AC	IV	0.1	89	4.8	18.5181	0	87	5.7	15.2273	0.2	75.2	11.8	6.38333	NDB	Testing
PT139	Female	57.1836	Black	Not Hispanic/Latino	Former	0	No	Yes	No	Yes	AC	IV	0.1	72.5	18.7	3.88214	0	70.3	20.5	3.44037	0.2	71.4	18.7	3.8301	NDB	Testing
PT140	Male	69.2247	White	Not Hispanic/Latino	Former	1	Yes	Yes	No	Yes	AC	IV	5.5	70.8	13.3	5.3038	5.8	63.5	21.3	2.98515	5.6	60.8	22.4	2.71242	DCB	Testing
PT141	Male	53.4685	Black	Not Hispanic/Latino	Former	1	No	Yes	No	Yes	AC	IIIB	2.4	73.9	14.6	5.0625	2.7	60.3	20	3.01493	1.9	56.1	26.7	2.10714	DCB	Testing
PT142	Female	66.5315	White	Not Hispanic/Latino	Former	0	No	Yes	No	Yes	AC	IV	0.7	76.5	14.8	5.17978	0.8	54.3	31.1	1.75	0.5	58.7	29.8	1.97268	NDB	Testing
PT143	Female	72.8849	White	Not Hispanic/Latino	Former	1	No	Yes	No	Yes	AC	IIIA	0	79.7	10.1	7.84	0.5	50.4	31	1.63235	0.4	65.6	18.4	3.56974	NDB	Testing
PT144	Female	72.8575	White	Not Hispanic/Latino	Never	2	No	No	No	No	AC	IV	4.3	61.3	24.9	2.46617	2.2	73.3	15.4	4.74815	0	85	10.4	8.15854	NDB	Testing
PT145	Female	79.5863	Unknown	Not Hispanic/Latino	Never	0	No	No	No	No	AC	IV	0.8	74.9	22	3.39683	3.9	61.4	19.9	3.09184	5.2	63.3	19.7	3.21477	DCB	Testing
PT146	Male	60.4	Black	Not Hispanic/Latino	Former	0	No	Yes	No	Yes	AC	IV	1	76	11.3	6.7375	0.4	84.7	5.7	14.7692	0.4	79.1	9.9	7.96296	NDB	Testing
PT147	Male	57.2548	White	Not Hispanic/Latino	Current	2	No	Yes	No	Yes	AC	IIIB	2	63.3	16.6	3.82456	2.7	57.1	22	2.59259	2.8	62.9	17.7	3.54878	DCB	Testing
PT148	Female	52.2767	White	Not Hispanic/Latino	Never	0	Yes	Yes	No	Yes	AC	IB	0.2	70.2	24.6	2.84158	6.5	41.6	37.5	1.10769	3.6	39.4	45.3	0.870968	DCB	Testing
PT149	Male	67.589	White	Not Hispanic/Latino	Former	1	No	Yes	No	Yes	SqCC	IV	0.2	56.2	19.1	2.94309	6.4	60.9	18.6	3.27857	4.7	54.1	24.5	2.21277	DCB	Testing
PT150	Male	57.3726	White	Not Hispanic/Latino	Current	0	No	No	No	No	SqCC	IV	3	76.1	9.3	8.13846	1.2	79	9.1	8.7037	4.4	76.2	7.9	9.62	DCB	Testing
PT151	Male	59.8986	White	Not Hispanic/Latino	Former	1	Yes	Yes	Yes	Yes	AC	IIIB	NA	NA	NA	NA	NA	NA	NA	NA	NA	NA	NA	NA	DCB	Testing
PT152	Male	65.737	Black	Not Hispanic/Latino	Former	1	No	Yes	No	Yes	SqCC	IA	2.3	72.7	12	6.07826	4.7	68.8	15.9	4.23077	5.3	67.1	15.2	4.41071	DCB	Testing
PT153	Male	34.8959	Black	Not Hispanic/Latino	Former	1	No	Yes	No	Yes	AC	IIB	1.1	74.1	15.2	4.86719	0.1	87.2	7.3	12	0.2	68.2	17	4.01235	NDB	Testing
PT154	Male	48.5534	White	Not Hispanic/Latino	Former	0	No	No	No	No	SqCC	IV	1.5	84.3	4.4	19.3457	NA	NA	NA	NA	NA	NA	NA	NA	NDB	Testing
PT155	Female	58.3068	White	Not Hispanic/Latino	Former	2	No	Yes	No	Yes	AC	IIIA	4.1	65.5	20.5	3.19192	2.9	63.4	20.1	3.15385	2.9	63.4	20.1	3.15385	DCB	Testing
PT156	Female	77.1507	White	Not Hispanic/Latino	Former	0	No	Yes	No	Yes	AC	IB	5.4	74	9.9	7.45455	1.5	83.3	5.1	16.3279	0	89.6	2.3	15.5625	NDB	Testing
PT157	Male	57.0384	White	Not Hispanic/Latino	Never	0	No	No	No	No	AC	IV	NA	NA	NA	NA	NA	NA	NA	NA	NA	NA	NA	NA	NDB	Testing
PT158	Male	64.7973	White	Not Hispanic/Latino	Never	2	Yes	Yes	Yes	Yes	SqCC	IIIB	2	70.1	17	4.11828	3.6	70.4	15.7	4.5	0.2	91.4	4.8	19.1493	DCB	Testing
PT159	Male	46.463	Asian	Not Hispanic/Latino	Former	0	No	Yes	No	Yes	AC	IV	0	71	5	7.02326	0.2	78.6	10.8	7.25	0.1	66.6	18.7	3.56098	DCB	Testing
PT160	Male	72.1123	White	Not Hispanic/Latino	Former	0	No	No	No	No	AC	IIB	4.7	56.9	31.2	1.83	6.4	51.5	33.7	1.53398	6.2	52.8	32.3	1.63536	DCB	Testing
PT161	Female	51.5205	Black	Not Hispanic/Latino	Current	0	No	No	No	No	SqCC	IIIA	1.2	68.8	23.2	2.96154	1.2	52.2	39.4	1.32558	2	50.9	38.3	1.32922	DCB	Testing
PT162	Female	71.074	White	Not Hispanic/Latino	Current	0	Yes	No	No	No	SqCC	IV	0.9	62.3	28.6	2.17881	1	62.8	28	2.24164	0.5	73.6	19.3	3.8191	DCB	Testing
PT163	Male	74.274	White	Not Hispanic/Latino	Former	0	No	Yes	No	Yes	SqCC	IA	3	68.2	18.6	3.67133	6	24.9	57.1	0.435484	NA	NA	NA	NA	NDB	Testing
PT164	Male	73.2137	White	Not Hispanic/Latino	Never	1	No	Yes	No	Yes	AC	IIIA	0.7	56	22	2.53968	NA	NA	NA	NA	NA	NA	NA	NA	NDB	Testing
PT165	Male	55.526	White	Hispanic/Latino	Former	1	No	Yes	No	Yes	SqCC	IV	0.5	71.6	15.5	4.62921	0.4	68.8	21	3.27184	0.4	68.8	21	3.27184	NDB	Testing
PT166	Female	63.2356	Black	Not Hispanic/Latino	Former	0	No	Yes	No	Yes	AC	IV	5	26	60	0.428571	3	32	58	0.533333	0.8	26.8	64	0.417021	DCB	Testing
PT167	Female	71.863	White	Not Hispanic/Latino	Former	2	No	Yes	No	Yes	SqCC	IIIB	0.9	65.4	22.7	2.87421	0.3	79.2	10	7.88506	0.7	76.1	10.9	6.98947	NDB	Testing
PT168	Female	72.6082	White	Not Hispanic/Latino	Former	0	No	No	No	No	AC	IV	4.8	75	10.5	7.18182	0	92.2	3.7	25.0943	4.5	68.5	15.2	4.50515	NDB	Testing
PT169	Female	66.9781	Black	Not Hispanic/Latino	Former	0	No	Yes	No	Yes	AC	IV	2.3	55.5	32	1.73743	4	47	41	1.06667	0	68	24.7	2.75439	NDB	Testing
PT170	Male	62.3781	White	Not Hispanic/Latino	Former	0	Yes	Yes	No	Yes	AC	IV	2	60.6	25.1	2.41071	0	75.3	18.9	3.91429	0	60.1	24.7	2.43671	NDB	Testing
PT171	Male	66.9699	White	Not Hispanic/Latino	Former	0	Yes	Yes	No	Yes	AC	IV	0.7	82	8.5	9.63492	0.5	58.8	26.6	2.21818	0	86.1	5.8	14.8065	NDB	Testing
PT172	Male	58	White	Not Hispanic/Latino	Former	0	Yes	Yes	No	Yes	AC	4	0	84	10.7	7.85185	0	76.1	14.3	8.32692	1.3	46	38.3	1.20175	NDB	Validation
PT173	Male	43	White	Not Hispanic/Latino	Former	2	No	Yes	No	Yes	AC	4	3.5	71.6	12	5.98148	5	70	16	4.33333	6.2	71.4	16	6.17568	NDB	Validation
PT174	Female	52	Asian	Not Hispanic/Latino	Never	0	No	No	No	No	AC	4	0.2	68.3	21.8	3.13402	0.1	80.5	12.7	6.35227	0.1	71.7	16.6	4.30597	NDB	Validation
PT175	Female	74	Other	Unknown	Former	0	No	Yes	No	Yes	SqCC	4	0.1	93.8	3.4	27.18	1.5	84.1	9.2	9.17568	0.4	83.3	9.5	8.8	NDB	Validation
PT176	Female	60	White	Not Hispanic/Latino	Former	0	Yes	Yes	No	Yes	AC	4	1.4	74	18.8	3.94309	0	71.4	19.6	3.64881	0	78	18.3	4.25316	NDB	Validation
PT177	Female	73	White	Not Hispanic/Latino	Former	1	No	No	No	No	AC	4	1.6	53.8	32.9	1.63306	1.9	57.6	28	2.05932	1.4	64	23	2.79412	NDB	Validation
PT178	Male	59	Black	Not Hispanic/Latino	Former	1	No	Yes	No	Yes	AC	3a	0.4	78.4	7.5	10.4211	1.2	84.7	5.6	15	0	93.4	1.1	88.5926	NDB	Validation
PT179	Female	76	Black	Not Hispanic/Latino	Former	0	Yes	Yes	No	Yes	AC	4	0.7	87.5	5.4	12.8785	0.1	87.5	4.2	13.0289	NA	NA	NA	NA	NDB	Validation
PT180	Male	56	Black	Not Hispanic/Latino	Former	0	No	No	No	No	AC	4	3.3	56.6	25.9	2.18182	0.8	75.4	13.5	5.57233	0.1	65.4	22.6	2.96429	NDB	Validation
PT181	Male	56	White	Not Hispanic/Latino	Former	1	No	Yes	No	Yes	SqCC	2a	1.3	80	10.5	7.61364	1.5	78.4	11	5.71	1.9	78.4	10.9	7.22785	DCB	Validation
PT182	Male	80	White	Not Hispanic/Latino	Former	1	Yes	Yes	No	Yes	AC	3a	4.3	54	29.2	1.96277	8.3	52.4	27.1	2	8.3	73.7	29.7	1.77019	DCB	Validation
PT183	Male	68	White	Not Hispanic/Latino	Former	1	No	Yes	No	Yes	AC	3a	5	60.3	18.2	3.30534	5.8	65	14.1	4.5614	4.6	67	14.5	4.63077	DCB	Validation
PT184	Female	64	White	Not Hispanic/Latino	Former	2	No	No	No	No	SqCC	4	1	52	37	1.4	2.5	67.9	20.2	3.35417	3.1	63.5	23.9	2.71765	NDB	Validation
PT185	Male	55	White	Not Hispanic/Latino	Former	0	No	Yes	No	Yes	AC	4	4.4	75.1	8.2	9.17021	1.1	62	18.8	3.29545	1.9	67.7	15.4	4.39394	NDB	Validation
PT186	Male	55	Black	Not Hispanic/Latino	Former	1	No	Yes	No	Yes	SqCC	4	8.2	43.3	37.6	1.15423	6.8	48	34.7	1.26368	5.2	50.4	35.4	1.42424	DCB	Validation
PT187	Female	69	White	Not Hispanic/Latino	Never	0	No	Yes	No	Yes	AC	4	11.8	69.1	12.5	5.45714	9.6	59.7	19.2	3.08	5.7	60	10.6	2.61682	DCB	Validation
PT188	Male	76	White	Not Hispanic/Latino	Former	0	No	No	No	No	AC	4	2.7	62.7	22.2	2.81868	2	43	22	1.73451	2	45.1	24.7	1.82569	DCB	Validation
PT189	Male	56	White	Not Hispanic/Latino	Former	1	No	Yes	No	Yes	AC	2b	1.4	61.6	20.7	2.97959	0.6	66.8	17	3.92727	0.8	75	14.6	5.13661	NDB	Validation
PT190	Female	50	White	Not Hispanic/Latino	Former	1	No	No	No	No	AC	4	4.3	68.5	18.1	3.6	3.7	70.7	19.5	3.66667	3.8	70.1	18.6	3.8	DCB	Validation
PT191	Male	59	Black	Not Hispanic/Latino	Former	1	No	Yes	No	Yes	AC	2a	1.1	76.8	11.4	6.70588	0	89.1	6	14.76	1	82.7	8.9	9.2375	DCB	Validation
PT192	Female	71	White	Not Hispanic/Latino	Former	0	Yes	Yes	Yes	No	AC	4	1.4	73.4	7.6	9.60656	0	91.3	1.9	47.0333	0	91.2	1.7	53.037	NDB	Validation
PT193	Female	75	Black	Not Hispanic/Latino	Former	0	No	No	No	No	AC	4	8.3	45.3	33.9	1.34211	0.9	43.6	40.4	1.07798	0	67.7	15	4.64	DCB	Validation
PT194	Female	68	White	Not Hispanic/Latino	Former	0	No	Yes	No	Yes	AC	4	1.1	72.6	17.5	4.1371	3.4	70.8	16.3	4.33913	1.8	63.9	24	2.68966	DCB	Validation
PT195	Female	48	Black	Not Hispanic/Latino	Current	1	No	Yes	No	Yes	AC	3A	1	82	13	6.52101	0	64.4	24.6	2.64948	0	58	27	2.06154	DCB	Validation
PT196	Female	61	White	Not Hispanic/Latino	Former	0	No	Yes	No	Yes	SqCC	4	2	70	0	3.22222	2	67	19	3.38095	4	61.4	24.5	1.96825	DCB	Validation
PT197	Male	65	White	Not Hispanic/Latino	Former	1	No	No	No	No	AC	4	3.3	51.5	24.2	2.12766	4.6	62.3	17	3.66667	4.5	58	21.6	2.68153	DCB	Validation
PT198	Male	74	White	Not Hispanic/Latino	Current	0	No	Yes	No	Yes	AC	4	0.9	80	8.4	9.52381	2.3	64	13.44	4.79661	1.3	66	15.4	4.2735	NDB	Validation
PT199	Female	59	White	Not Hispanic/Latino	Current	0	No	No	No	No	AC	3c	1.9	81.2	8.9	9.17544	10.2	64.5	16.2	3.97015	16.3	62.8	12.3	5.12281	DCB	Validation
PT200	Female	63	White	Not Hispanic/Latino	Former	1	No	No	No	No	Other	4	1.3	56.7	23.5	2.41011	0.1	88.2	10.1	7.87556	NA	NA	NA	NA	NDB	Validation
PT201	Female	72	White	Not Hispanic/Latino	Former	0	No	No	No	No	AC	4	7.2	68.3	16.8	4.08	NA	NA	NA	NA	NA	NA	NA	NA	NDB	Validation
PT202	Male	64	White	Not Hispanic/Latino	Never	1	No	Yes	No	Yes	AC	4	1.2	87.3	3.7	23.7805	0.2	81.5	4.3	19.0351	0	82	8	10.2435	NDB	Validation
PT203	Male	63	White	Not Hispanic/Latino	Former	1	No	Yes	No	Yes	SqCC	3b	1.2	77.4	9.9	7.85333	1	79	10	7.16	1.3	82.6	6.8	12.1356	NDB	Validation
PT204	Female	68	White	Unknown	Former	1	No	No	No	No	AC	4	0.9	55	34.2	1.6145	1.8	40.4	48	0.845957	0.4	44.7	47	0.949597	DCB	Validation
PT205	Female	63	White	Not Hispanic/Latino	Never	0	No	No	No	No	AC	4	0	86.2	6.5	13.3258	0	82.7	9	9.18947	0	79.7	13.8	5.76101	NDB	Validation
PT206	Female	84	White	Not Hispanic/Latino	Former	1	No	Yes	No	Yes	AC	3b	3.1	72.7	14.3	5.06757	4.4	73.1	14.3	4.16667	2.1	73.9	12	6.14737	DCB	Validation
PT207	Male	69	White	Not Hispanic/Latino	Former	0	No	Yes	No	Yes	AC	4	6.2	75.2	7.7	9.75	1.4	80.8	7.8	10.38	0.9	78.1	9.3	8.44186	DCB	Validation
PT208	Male	64	White	Not Hispanic/Latino	Current	0	No	No	No	No	AC	4	1.2	69.5	20.6	3.37349	0	50	38	1.3125	0	62	26	2.35714	DCB	Validation
PT209	Male	56	White	Not Hispanic/Latino	Current	1	No	Yes	No	Yes	SqCC	3b	1.3	79	11.2	7.08333	1.6	74.7	14.5	5.16535	0.7	79.3	11.5	6.91304	DCB	Validation
PT210	Male	58	White	Unknown	Former	1	Yes	Yes	Yes	No	AC	4	0.5	53.4	32.8	1.62782	0.6	55.7	25.9	1.61111	0	72	15	4.91346	NDB	Validation
PT211	Male	69	White	Not Hispanic/Latino	Former	0	Yes	Yes	No	Yes	AC	4	2.2	73.2	11	6.64615	4	73.1	9.4	7.775	2.9	73.5	12	6.13514	DCB	Validation
PT212	Male	80	White	Not Hispanic/Latino	Former	1	Yes	Yes	No	Yes	SqCC	3A	2.7	82.8	8	10.1413	1.8	84.2	6.9	12.1525	3	83.8	5.1	16.2982	NDB	Validation
PT213	Female	67	Other	Not Hispanic/Latino	Never	1	No	No	No	No	AC	4	4.5	53	25.8	2.05405	7.5	57.8	21.7	2.66667	6.5	61.4	19	3.2234	DCB	Validation
PT214	Male	67	White	Not Hispanic/Latino	Former	0	No	Yes	No	Yes	AC	4	2.4	79.8	9	9.11111	0	77	11	7.34682	12	58	12	4.89189	DCB	Validation
PT215	Male	73	White	Not Hispanic/Latino	Former	0	No	No	No	No	AC	4	3.5	71.1	13.2	5.36905	2.8	69.9	16.1	4.34677	3.4	67.3	17.3	3.86992	NDB	Validation
PT216	Female	70	White	Not Hispanic/Latino	Former	0	Yes	No	No	No	AC	4	6.3	68.3	13	5.24	6.1	56.7	19.5	2.9	5	75	14	5.83333	DCB	Validation
PT217	Male	66	White	Not Hispanic/Latino	Former	1	No	No	No	No	SqCC	4	3.2	70.6	17.1	4.125	5.4	67.3	19.3	3.49074	3.9	78.1	9.9	7.86473	NDB	Validation
PT218	Male	61	Black	Not Hispanic/Latino	Former	0	Yes	Yes	No	Yes	SqCC	3a	1.9	44.6	40.9	1.09091	2.2	48.1	35.9	1.34228	1.3	55.8	30.4	1.83544	NDB	Validation
PT219	Female	71	Black	Not Hispanic/Latino	Former	1	No	No	No	No	SqCC	4	2.4	53	34.1	1.5545	3.4	63.2	22.7	2.78977	2.8	56	31.5	1.77477	DCB	Validation
PT220	Female	68	White	Not Hispanic/Latino	Former	0	No	Yes	No	Yes	AC	4	2.8	66	14.5	4.06977	5	63.6	18	3.52247	6	50	29	1.77778	DCB	Validation
PT221	Male	74	White	Not Hispanic/Latino	Former	0	Yes	Yes	Yes	No	AC	4	6.7	52.9	28.3	1.86667	9.8	49.2	25.6	2.18023	8.3	55.5	25.6	2.16279	DCB	Validation
PT222	Female	74	Black	Not Hispanic/Latino	Never	0	No	No	No	No	AC	1A	2.9	65.2	22.5	2.89677	3.1	67.6	21	3.22148	3	67.2	19	3.53901	DCB	Validation
PT223	Male	63	White	Not Hispanic/Latino	Former	0	Yes	No	No	No	AC	1A	8	56	15	3.7284	8.9	50.2	19.6	2.56452	11.1	51.7	17	3.02907	DCB	Validation
PT224	Female	63	White	Not Hispanic/Latino	Former	1	No	Yes	No	Yes	AC	1a	2.6	73.2	15	4.9	3.4	74.4	12.4	5.99091	2.4	76.7	15.2	4.15672	DCB	Validation
PT225	Male	72	White	Not Hispanic/Latino	Former	1	No	No	No	No	AC	4	3.6	62.9	24.1	2.61326	0	33.5	49	0.694444	0	59.3	18.7	2.89565	DCB	Validation
PT226	Female	74	White	Not Hispanic/Latino	Former	0	No	Yes	No	Yes	AC	2b	2.3	47.4	34.9	1.35766	1.2	60.7	24.1	2.51261	1.9	62.2	19.5	3.19048	NDB	Validation
PT227	Female	56	White	Not Hispanic/Latino	Former	0	No	Yes	No	Yes	AC	4	3.1	75.3	11.6	7.71795	2.5	77.3	11.9	6.48611	2	73.8	14.8	5	NDB	Validation
PT228	Male	55	White	Not Hispanic/Latino	Former	1	No	Yes	No	Yes	AC	3a	8.5	67.5	17.5	3.88889	8	64	21	3.09091	9	66	19	3.3	DCB	Validation
PT229	Male	55	White	Not Hispanic/Latino	Never	1	No	Yes	No	Yes	AC	3b	8.3	55.5	24.2	2.29452	4.6	55.5	24.2	2.29452	4.5	55.6	19.4	2.85833	DCB	Validation
PT230	Female	55	Asian	Not Hispanic/Latino	Former	2	No	Yes	No	Yes	AC	4	4	82	8	6.97581	6.5	30.5	44.7	0.682927	6.7	20.5	62.1	0.33121	NDB	Validation
PT231	Female	67	White	Not Hispanic/Latino	Former	2	No	No	No	No	AC	4	4.5	71.9	12.2	5.89157	1.6	77.1	13	10.6061	0	92	3	31.0256	NDB	Validation
PT232	Male	49	Black	Not Hispanic/Latino	Former	0	No	No	No	No	AC	4	0	91.6	5.2	17.5172	0	82.5	8.9	9.28767	2.7	56.8	24.4	2.3375	NDB	Validation
PT233	Male	67	Other	Unknown	Former	1	Yes	Yes	No	Yes	SqCC	1a	1.4	71.4	18.5	3.85143	4.4	54.9	29.3	1.87791	4.8	60.4	27.5	2.19643	NDB	Validation
PT234	Male	51	White	Not Hispanic/Latino	Never	2	No	Yes	No	Yes	AC	4	2.1	80.6	6.6	12.2647	1.1	75.6	7	10.814	2.1	80	5	19.6744	NDB	Validation
PT235	Male	72	White	Not Hispanic/Latino	Former	0	No	Yes	No	Yes	AC	4	3.1	76.6	7.5	10.2216	0	85	3	17.6089	3	71	13	5.96667	NDB	Validation
PT236	Female	51	Black	Unknown	Never	0	No	No	No	No	AC	4	8.3	57.4	26.8	2.14091	7.1	69.2	15.5	4.46358	5.8	61.6	24.3	2.5303	NDB	Validation
PT237	Female	59	White	Not Hispanic/Latino	Former	0	No	No	No	No	SqCC	4	4.1	74.6	12.2	6.11881	1.7	80.6	9	8.96939	3.6	66.8	15.9	4.21429	NDB	Validation
PT238	Male	73	Other	Not Hispanic/Latino	Former	1	No	Yes	No	Yes	AC	3b	0.3	70.5	18.6	3.78378	0.6	73.8	18	4.01227	0.7	72.2	18	4.01227	NDB	Validation
PT239	Female	66	White	Not Hispanic/Latino	Current	0	No	Yes	No	Yes	AC	4	3.7	53.4	32.4	1.64528	5.5	54.2	28.5	1.89873	1.7	82.3	9	9.20213	DCB	Validation
RT: Radiation therapy, AC: Adenocarcinoma, SqCC: Squamous cell carcinoma, LCNEC: Large cell neuroendocrine carcinoma, NLR: Neutrophil-lymphocyte ratio, DCB: Durable clinical benefit, NDB: No durable benefit, NA: Not available, 1st follow up is time of 1st radiographic imaging after initiation of ICI

## Sheet: S2
Supplemental Table S2. Patient Characteristics of the Early Stage NSCLC cohort
Patient ID	Immune-targeted therapy	Gender	Age	Stage at Diagnosis	Smoking Status	Pack-years	Histology	ctDNA response	4w ΔNLR	4w Eosinophils (%)	RECIST response	Major Pathologic Response	Residual Tumor (%)	Time to Recurrence (months)
CGLU204	Nivolumab	male	61	IIB	Former	45	Squamous Cell Carcinoma	Undetectable	-0.660443	3.4	Partial Response	Yes	0	NA
CGLU205	Nivolumab	male	67	IIIA	Former	30	Other	Responder	0.228299	5.3	Stable Disease	No	40	NA
CGLU206	Nivolumab	male	62	IB	Former	20	Adenocarcinoma	Responder	-0.106523	4	Stable Disease	Yes	5	NA
CGLU215	Nivolumab	female	72	IA	Current	50	Squamous Cell Carcinoma	Undetectable	0.415895	5.7	Stable Disease	Yes	10	2
CGLU217	Nivolumab	male	66	IIIA	Former	35	Squamous Cell Carcinoma	Undetectable	0.638448	2.7	Stable Disease	No	80	10
CGLU218	Nivolumab	female	68	IIA	Former	10	Adenocarcinoma	Nonresponder	-0.0666667	1.3	Stable Disease	No	60	NA
CGLU219	Nivolumab	male	84	IIIA	Former	12	Adenocarcinoma	Responder	0.292308	0	Stable Disease	No	30	21
CGLU220	Nivolumab	female	58	IIIA	Never	0	Squamous Cell Carcinoma	Undetectable	-0.170732	4.4	Stable Disease	No	95	24
CGLU221	Nivolumab	male	69	IIA	Former	90	Squamous Cell Carcinoma	Responder	-0.58943	1.7	Stable Disease	No	50	NA
CGLU222	Nivolumab	male	55	IIA	Former	15	Adenocarcinoma	Nonresponder	0.262556	1.7	Stable Disease	No	75	2
CGLU223	Nivolumab	female	78	IIB	Former	45	Adenocarcinoma	Nonresponder	-0.203139	5	Stable Disease	Yes	5	NA
CGLU224	Nivolumab	male	70	IB	Former	90	Adenocarcinoma	Undetectable	0.0993111	2.2	Stable Disease	No	95	NA
CGLU225	Nivolumab	female	58	IIB	Former	10	Squamous Cell Carcinoma	Nonresponder	-0.419014	3.1	Stable Disease	No	80	NA
CGLU249	Nivolumab	female	60	IIB	Former	25	Squamous Cell Carcinoma	Responder	0.0040568	1.2	Stable Disease	Yes	5	NA
CGLU250	Nivolumab	female	66	IIA	Former	20	Squamous Cell Carcinoma	NE	-0.140212	3	Partial Response	Yes	5	NA
CGLU256	Nivolumab	female	74	IIIA	Never	0	Other	NE	-0.173299	3.2	Stable Disease	Yes	0	NA
CGLU259	Nivolumab	female	79	IIA	Former	20	Squamous Cell Carcinoma	Undetectable	-0.212919	4.1	Stable Disease	Yes	0	NA
CGLU264	Nivolumab	female	54	IA	Never	0	Adenocarcinoma	Undetectable	-0.0383871	0.9	Stable Disease	No	100	NA
CGLU265	Nivolumab	male	57	IIIA	Former	32	Adenocarcinoma	Undetectable	-0.091756	2.7	Stable Disease	Yes	5	9
CGLU279	Nivolumab	male	74	IIB	Former	50	Squamous Cell Carcinoma	Undetectable	0.00923952	1.4	Stable Disease	No	100	30
CGLU352	Nivolumab-Ipilimumab	female	56	IB	Former	7	Adenocarcinoma	Nonresponder	0.0416667	2.3	Progressive Disease	No	100	NA
CGLU356	Nivolumab-Ipilimumab	male	50	IIA	Current	10	Adenocarcinoma	Undetectable	0.316269	4.3	Stable Disease	No	30	1
CGLU358	Nivolumab-Ipilimumab	male	69	IIIA	Former	35	Adenocarcinoma	Nonresponder	1.11496	2.8	Progressive Disease	No	100	1
CGLU390	Nivolumab-Ipilimumab	male	53	IIIA	Former	80	Other	Responder	-0.18087	3.7	Partial Response	Yes	0	NA
CGLU394	Nivolumab-Ipilimumab	male	70	IIIA	Former	11	Adenocarcinoma	Undetectable	-0.339877	6.9	Stable Disease	Yes	0	NA
CGLU482	Nivolumab-Ipilimumab	male	79	IIB	Former	56	Other	Nonresponder	0.154571	1.5	Stable Disease	No	90	17
ctDNA: circulating tumor DNA; 4w: 4 weeks, ΔNLR: Relative change in neutrophil-lymphocyte ratio, NE: Non evaluable, NA: Non applicable as no disease recurrence has occurred within the timeframe of this analysis.

## Sheet: S3
Supplemental Table S3. Summary of RNASeq Characteristics
Patient ID	Timepoint	Reads Sequenced	Reads Mapped to Transcriptome	Percent Reads Mapped to Transcriptome (%)	Percent Reads Mapped to Multiple Loci (2-10) (%)	Percent Reads Mapped to Multiple Loci (>10) (%)	Average Read 1 Length (bp)	Average Read 2 Length (bp)	Bases Mapped to Transcriptome	Median Coverage
CGLU215	Baseline	150157630	143156670	0.953376	0.0534	0.0007	96.4143	94.6415	14073227483	94.69
CGLU217	Baseline	185581988	183244264	0.987403	0.044	0.0005	97.891	97.4515	18027050654	96.72
CGLU218	Post-neoadjuvant therapy	187365996	185592610	0.990535	0.0427	0.0004	98.0282	97.786	18262776905	96.82
CGLU218	Baseline	173063508	170718290	0.986449	0.0508	0.0004	98.0017	97.6682	16790095617	96.67
CGLU219	Baseline	86833922	85254474	0.981811	0.1008	0.0005	98.0037	97.5811	8385018894	95.77
CGLU219	Post-neoadjuvant therapy	83959382	82359630	0.980946	0.2202	0.0004	98.0865	97.7074	8099115834	94.89
CGLU220	Post-neoadjuvant therapy	171920498	168897010	0.982413	0.0652	0.0004	97.877	97.4675	16618055000	96.86
CGLU220	Baseline	182721782	181370886	0.992607	0.0464	0.0005	98.1353	97.9336	17846505238	96.37
CGLU221	Baseline	142613990	136087690	0.954238	0.0751	0.0005	96.8657	95.5304	13380559801	94.33
CGLU225	Post-neoadjuvant therapy	202000640	200265034	0.991408	0.0514	0.0004	98.2817	98.2968	19707628586	97.26
CGLU249	Post-neoadjuvant therapy	202879886	200776102	0.98963	0.0478	0.0004	98.0047	97.9612	19751170356	96.92
CGLU249	Baseline	169050242	162112520	0.958961	0.0612	0.0003	96.8598	95.2215	15937150495	96.55
CGLU250	Post-neoadjuvant therapy	193685168	192159574	0.992123	0.0586	0.0004	98.1947	98.2037	18899648853	96.95
CGLU250	Baseline	185709286	183305548	0.987056	0.0537	0.0008	97.8004	97.4684	18023520607	96.72
CGLU256	Baseline	174958830	172935360	0.988435	0.0329	0.0005	98.069	97.7951	17017667038	97.55
CGLU256	Post-neoadjuvant therapy	178013484	174059210	0.977787	0.0419	0.0027	97.6429	96.8299	17126923282	96.82
CGLU279	Post-neoadjuvant therapy	156623224	154658438	0.987455	0.0472	0.0006	97.9256	97.6678	15217739907	96.43
CGLU279	Baseline	127303808	115071164	0.90391	0.0478	0.0004	94.9865	91.9074	11304519706	92.12
CGLU352	Post-neoadjuvant therapy	148618416	145103300	0.976348	0.0508	0.0015	97.5302	96.8825	14267962095	95.53
CGLU352	Baseline	170760560	168481064	0.986651	0.0523	0.0007	97.8477	97.6044	16573498921	96.86
CGLU356	Post-neoadjuvant therapy	147625304	143722242	0.973561	0.0773	0.0005	97.2649	96.6724	14136121585	95
CGLU358	Baseline	171591696	169339206	0.986873	0.0403	0.0006	97.8287	97.4736	16658250192	96.73
CGLU390	Post-neoadjuvant therapy	124440840	120245190	0.966284	0.0572	0.0007	97.1418	96.6281	11825181850	94.07
CGLU390	Baseline	116812946	108026872	0.924785	0.0779	0.0003	96.1366	93.7247	10625919780	93.9
CGLU482	Baseline	170060898	166396784	0.978454	0.0694	0.0005	98.0315	97.6903	16374220970	96.45

## Sheet: S4
Supplemental Table S4. Gene Set Enrichment Analysis (Baseline Tumor Samples)
Gene Set	pval	padj	log2err	ES	NES	Size	Leading Edge 1	Leading Edge 2	Leading Edge 3	Leading Edge 4	Leading Edge 5	Leading Edge 6	Leading Edge 7	Leading Edge 8	Leading Edge 9	Leading Edge 10	Leading Edge 11	Leading Edge 12	Leading Edge 13	Leading Edge 14	Leading Edge 15	Leading Edge 16	Leading Edge 17	Leading Edge 18	Leading Edge 19	Leading Edge 20	Leading Edge 21	Leading Edge 22	Leading Edge 23	Leading Edge 24	Leading Edge 25	Leading Edge 26	Leading Edge 27	Leading Edge 28	Leading Edge 29	Leading Edge 30	Leading Edge 31	Leading Edge 32	Leading Edge 33	Leading Edge 34	Leading Edge 35	Leading Edge 36	Leading Edge 37	Leading Edge 38	Leading Edge 39	Leading Edge 40	Leading Edge 41	Leading Edge 42	Leading Edge 43
HALLMARK_MYOGENESIS	0.0303922	0.100182	0.352488	0.357174	1.33431	169	GNAO1	MB	MAPRE3	SOD3	CACNA1H	GADD45B	GABARAPL2	MYOZ1	ACTN2	CTF1	TNNC2	MYOM2	CASQ2	DTNA	PYGM	ITGA7	LDB3	NAV2	SH3BGR	MYOM1	MYL4	COX7A1	HSPB2	CDKN1A	MYH11	ACSL1	TSC2	DMPK	ADCY9	IFRD1	HDAC5	FXYD1	ACTC1	SORBS1	HRC	TPM2	MYBPH	PVALB	DMD	CHRNB1	MYL6B	MEF2D	FKBP1B
WIKMAN_ASBESTOS_LUNG_CANCER_UP	0.164773	0.357677	0.148262	0.541082	1.2981	15	PREPL	IFT74	ADD1	ZNF140	SLC6A14	MAEA
GSE9650_EFFECTOR_VS_EXHAUSTED_CD8_TCELL_DN	0.0930233	0.267067	0.195789	0.326074	1.21813	169	SYT1	LHCGR	GNAO1	SSBP2	SCRG1	NRK	SIX1	EFNB3	MAP2	OVGP1	NKIRAS1	ZFP28	DUSP6	CYP4V2	DPP7	SCAMP1	COCH	KCNAB1	TRPC1	PTGER2	NEFH	SPRED2	ACSL1	KCTD12	TMEM150A
T_CELL_INFLAMMATORY_GEP	0.237817	0.423314	0.122679	0.476759	1.18726	18	IDO1	HLA-DQA1	HLA-DRB1	CXCL9	CD274	PSMB10	CD8A	HLA-E	NKG7	CCL5	LAG3
HALLMARK_HEDGEHOG_SIGNALING	0.255278	0.436919	0.116739	0.425872	1.15367	27	CDK5R1	RASA1	HEY2	TLE1	DPYSL2	AMOT
HALLMARK_TNFA_SIGNALING_VIA_NFKB	0.25	0.436275	0.113787	0.288693	1.09732	196	NR4A3	NR4A1	GADD45B	PHLDA1	ZFP36	FOS	DUSP5	CLCF1	TIPARP	DUSP1	JUN	JUNB	RHOB	EGR1	FOSB	PER1	AREG	PPP1R15A	MAFF	ATF3	CXCL11	CSF2	CDKN1A	CEBPD	EIF1	IER2	KLF2	CXCL2	PLAU	TRIB1	CD69	NR4A2	DUSP2	SOCS3	MCL1	CFLAR	CCND1	IFIT2	SDC4	CSF1	STAT5A	GEM	KLF4
HALLMARK_HEME_METABOLISM	0.431127	0.629021	0.0810802	0.267804	1.00044	169	RNF19A	SPTB	HAGH	SNCA	AGPAT4	TMCC2	NFE2	SLC25A37	ICAM4	VEZF1	FTCD	KAT2B	ATP6V0A1	ENDOD1	MYL4	YPEL5	ADD1	MKRN1	EPOR	ALDH1L1	SLC22A4	MBOAT2	FBXO7	SYNJ1	LMO2	TMEM9B	UCP2	EZH1	GYPC	BNIP3L	PPOX	PPP2R5B	CLIC2	SPTA1	ATG4A	BLVRA	RHCE	PIGQ	SEC14L1	DMTN
GSE1740_UNSTIM_VS_IFNA_STIMULATED_MCSF_DERIVED_MACROPHAGE_DN	0.462094	0.647249	0.077884	0.266589	0.988024	163	CDC42EP3	EREG	LCN12	BDNF-AS	DUSP5	RGMB	RGS17	HLA-DQB1	RSAD2	VPS9D1	C12orf42	IQCH	RAB18	HSPA4L	AMN1	MTHFD2L	CSF2	GNPDA2	TMEM87A	PAX8	EIF1	HLA-DQA1	HLA-DRB1	CCDC180	SCML1	FAM161A	MR1	IFRD1	LINC00205	CXCL2	CEP290	MDGA1
HALLMARK_UV_RESPONSE_DN	0.600358	0.797491	0.0643583	0.260721	0.938775	134	MAP1B	GCNT1	CACNA1A	DUSP1	DBP	MAGI2	PLCB4	ARHGEF9	DDAH1	PRKCE	YTHDC1	MGLL	MET	CDC42BPA	PRKAR2B	ATRX	KALRN	SPOP	CELF2	MT1E	INPP4B	PTPN21	PTEN	RGS4	NR1D2	EFEMP1	SMAD7	PTPRM	CITED2
HALLMARK_APOPTOSIS	0.793478	1	0.0517405	0.234379	0.864676	157	GADD45B	EREG	JUN	RHOB	ENO2	FAS	ATF3	SATB1	NEFH	ADD1	BCL2L1	CDKN1A	TNFRSF12A	RARA	EMP1	CYLD	CREBBP	MADD	GPX4	ANKH	CD69	XIAP	BNIP3L	CCND2	PPP2R5B	MCL1	CFLAR	BCL10	CCND1	DNAJA1	SMAD7
HALLMARK_APICAL_JUNCTION	0.827465	1	0.048506	0.229924	0.864189	178	AMIGO2	GAMT	ADRA1B	ACTN2	TMEM8B	WASL	NLGN3	NEGR1	ICAM4	RASA1	ITGA10	NRTN	CLDN6	CLDN9	ITGA3	CLDN8	NEXN	NFASC	CX3CL1
GSE5099_MONOCYTE_VS_ALTERNATIVE_M2_MACROPHAGE_DN	0.807692	1	0.0492918	0.232256	0.858817	152	B3GAT1	CELF5	NPTN	CMYA5	METRN	METTL15	IDUA	CDK5R1	SMURF2	ZNF493	PER1	PLS3	SIRT3	CHMP5
HALLMARK_TGF_BETA_SIGNALING	0.875233	1	0.048506	0.250706	0.778677	53	JUNB	SMURF2	PPP1R15A	PPM1A	ACVR1	CDK9	UBE2D3	TRIM33	XIAP	SMURF1	CDKN1C	SMAD7	ID3
HALLMARK_NOTCH_SIGNALING	0.821561	1	0.0513223	0.274224	0.773013	32	DTX1	HEYL	FZD1	MAML2	WNT5A	SKP1	CCND1	FBXW11	JAG1
KEGG_ANTIGEN_PROCESSING_AND_PRESENTATION	0.98893	1	0.0425023	0.204205	0.650837	61	HLA-DRB5	HLA-DQB1	RFXAP	HLA-DQA1	HLA-DRB1	KLRC3	HLA-DOA	CD74	KLRC2	KLRC4	CREB1	CD8A	HLA-DPA1	HLA-DMA	HLA-DOB	HLA-E	HLA-DPB1	HLA-A	CD8B
WIKMAN_ASBESTOS_LUNG_CANCER_UP	0.975926	1	0.0432769	0.209028	0.642273	49	FAS	CXCL11	HLA-DQB2	HLA-DRB1	CXCL9	SOCS3	CD274	MEX3B	CXCL10	PSMB10	HLA-DPA1	IRF3	HLA-E	HLA-DPB1	HLA-A	STAT2	IFNG
HALLMARK_ANGIOGENESIS	0.954972	1	0.0448645	0.226473	0.633869	31	PRG2	APOH	STC1	CCND2
HALLMARK_ALLOGRAFT_REJECTION	1	1	0.0515309	-0.119558	-0.454256	183	TRAF2	IFNGR1	BRCA1	IKBKB	CCL7	TAPBP	IL2RA	NCK1	FCGR2B	ABCE1	MRPL3	GALNT1	IL1B	EIF3D	ACVR2A	ACHE	SRGN	EIF5A	CCR1	IL10	LCK	CCR2	CD7	CDKN2A	RPS19	ABI1	CCL19	TLR6	CCL11	GPR65	NPM1	IRF8	EIF3A	CD80	BCAT1	ICOSLG	AKT1	ETS1	DYRK3	ELF4	IRF4	TNF	MMP9
HALLMARK_INTERFERON_ALPHA_RESPONSE	1	1	0.0481184	-0.142028	-0.505138	95	LAMP3	PSMA3	NCOA7	SAMD9	CCRL2	USP18	IRF9	HELZ2	LPAR6	OASL	IFI27	ISG20	PNPT1	PARP14	RNF31
HALLMARK_PROTEIN_SECRETION	1	1	0.0479259	-0.149583	-0.530311	94	ABCA1	IGF2R	COPB2	ERGIC3	ZW10	RAB22A	ARFGEF2	SH3GL2	M6PR	GLA	VPS45	ADAM10	COG2	CLTA	ANP32E	GNAS	COPE	MAPK1	VPS4B	DST	AP2S1	STX7	RER1	LMAN1	DNM1L
grasso_ifna	0.987097	1	0.0495902	-0.202799	-0.574503	30	IFNGR1	STAT3	CXCL16	IRF9
HALLMARK_INTERFERON_GAMMA_RESPONSE	1	1	0.0509083	-0.152291	-0.582964	196	RIPK1	PTPN1	MTHFD2	P2RY14	CASP3	XCL1	PSMA3	STAT3	NUP93	SOD2	CCL7	TAPBP	USP18	NCOA3	CASP7	IRF9	GBP6	PTGS2	SPPL2A	HELZ2	PNP	PFKP	OASL	PSMB2	IFI27	TNFAIP6	ISG20	PNPT1	IL18BP	TNFAIP3	PARP14	TNFSF10
KEGG_TOLL_LIKE_RECEPTOR_SIGNALING_PATHWAY	0.997872	1	0.0486034	-0.179974	-0.62562	86	RIPK1	MAP2K6	PIK3CB	IKBKE	TAB2	IKBKB	MAP2K3	IL1B	IRAK1	PIK3CG	MAP3K8	PIK3R3	CD14	TLR6	MAPK14	MAPK1	CD80	TLR4	TRAF3	MAP2K2	TBK1	AKT1
WIKMAN_ASBESTOS_LUNG_CANCER_DN	0.934322	1	0.0514265	-0.235306	-0.667079	29	MUSK	MIEF1	ITGA4	FKBP1A	CCR2	FNTA	AGAP4	GIMAP6	ATM	PRKCSH	MAFB	CD86
REACTOME_INFLAMMASOMES	0.895062	1	0.052057	-0.273649	-0.699522	19	PANX1	NFKB2	TXN	NLRC4	PYCARD
GSE5099_MONOCYTE_VS_CLASSICAL_M1_MACROPHAGE_DN	0.988558	1	0.0523759	-0.199956	-0.758453	180	NUF2	PLBD1	CHEK1	ISY1	AIMP2	ASF1B	WDHD1	RIT1	ERGIC3	TPM3	CYB561A3	C1QBP	CENPJ	LSM2	TUBA1B	DERL2	MFSD5	TP53RK	CCDC77	PROSER1	SLC25A3	PPP4C	ILF3	DCAF13	PTGR1	SMAD2	RNF165	UBAC1	ITPA	EIF5A	ETV6	BCL2A1	EHD4	SMS	UNC5B	GNAS	PRPF6	HOXB6	C18orf21	EIF2D	RAB43	NPM1
KEGG_NOD_LIKE_RECEPTOR_SIGNALING_PATHWAY	0.883475	1	0.0540088	-0.238724	-0.766593	57	CARD18	TAB2	HSP90B1	IKBKB	CCL7	NOD2	IL1B	NLRC4	PYCARD	CARD6	TNFAIP3	CCL11	MAPK14	MAPK1	BIRC2	NFKBIB
GSE16385_UNTREATED_VS_12H_IL4_TREATED_MACROPHAGE_DN	0.881696	1	0.05653	-0.222173	-0.833987	158	BMPER	TMPRSS11F	S1PR5	MTRR	BPIFC	PRG4	TXNDC12	PSPH	ADAMTS12	MRPL18	NUP50	DHX32	TPP2	SLC10A7	PDCL3	PTK7	AKR1E2	LARP4B	HDAC2	ZNF143	PDCD10	AGFG1	ANKRD33B	MTBP
GSE5099_MONOCYTE_VS_CLASSICAL_M1_MACROPHAGE_UP	0.879464	1	0.0566484	-0.222309	-0.834481	159	CDC45	AURKA	PLK1	PADI3	PCSK6	TRAIP	CCHCR1	CXADR	MRPL52	APEX1	NVL	ARPC2	LDHB	SARS2	NECAB1	FAM163A	TAGLN2	FKBP4	IFFO2
HALLMARK_KRAS_SIGNALING_UP	0.87007	1	0.0589694	-0.225676	-0.849517	173	HOXD11	SERPINA3	MYCN	GABRA3	AMMECR1	ADAM17	PRKG2	ANXA10	NR1H4	ALDH1A2	SCN1B	HSD11B1	JUP	SOX9	ADAMDEC1	G0S2	PCP4	RBP4	IL1B	GPNMB	CCL20	PTGS2	ACE	MAP3K1	RBM4	TFPI	ZNF639
HALLMARK_IL6_JAK_STAT3_SIGNALING	0.736515	0.963968	0.0615707	-0.254017	-0.876773	80	PTPN1	BAK1	IFNGR1	IL18R1	STAT3	CCL7	IL2RA	ITGA4	IRF9	IL1B	LTBR	IL3RA	MAP3K8	CD9	ACVRL1	CCR1	CD14	A2M	CNTFR	CXCL3	ACVR1B	TNFRSF1B	CBL	IL10RB	IL1R1	HMOX1
GSE16385_UNTREATED_VS_12H_IL4_TREATED_MACROPHAGE_UP	0.553241	0.746037	0.0815265	-0.253257	-0.956492	175	CNGB3	FOXM1	MYCL	TRAIP	DNMT1	CCHCR1	PHGDH	DLX6	CASP8AP2	HEBP2	NPM3	ZFP92	GDPD2	CLMP	IL18R1	SF3B5	MARCKSL1	ACOT1	WDR76	ADAM15	BLCAP	MOCOS	IL2RA	STK24	PLA2G4F	GSC	SYNE3	ABHD4	HEG1	PRNP	TRAM2	YDJC	IKZF3	STK19	EFNA4	LPAR3	ATP2B4	PCGF2	SPOCK2	NXN
HALLMARK_IL2_STAT5_SIGNALING	0.524027	0.717515	0.0838361	-0.256862	-0.973858	185	UMPS	ODC1	AHCY	ITGA6	CDC6	ENO3	CCNE1	NOP2	IRF6	IFNGR1	TNFSF11	DHRS3	CASP3	IGF2R	IL18R1	CKAP4	SMPDL3A	SLC1A5	IGF1R	PLIN2	CTSZ	CYFIP1	NCOA3	IL2RA	PRNP	HK2	ST3GAL4	PUS1	ITGAV	DCPS	TGM2	SLC29A2	IL3RA	CTLA4	MAP3K8	PTCH1	AGER	IL1RL1	SNX9	TIAM1	LCLAT1	IL10
HALLMARK_HYPOXIA	0.465438	0.647249	0.0908241	-0.261272	-0.986925	178	PKP1	HOXB9	CA12	TMEM45A	ENO3	GAPDH	GPC3	STC2	NDST1	SLC2A1	SCARB1	SERPINE1	GPC1	SIAH2	PLIN2	SLC25A1	ADM	TPI1	XPNPEP1	PFKL	VHL	HK2	EXT1	TGM2	TPST2	PPARGC1A	MAP3K1	AK4	CAV1	GCNT2	LXN	PGM2	GPI	PFKP	LOX	SLC2A5	HSPA5	ISG20	PDK1	HEXA	TNFAIP3	EFNA1	GRHPR
GSE1740_UNSTIM_VS_IFNA_STIMULATED_MCSF_DERIVED_MACROPHAGE_UP	0.441379	0.633593	0.0937465	-0.272696	-0.997967	135	ASPM	ULBP2	HOXD13	CENPL	IGFL1	ZBED1	DTYMK	RSPO2	E2F7	NOP56	MAGEC2	ANXA10	XXYLT1	PTPRK	TAF4B	ACTR5	AP1AR	ZDHHC12	TMEM26	PIP5K1B
HALLMARK_XENOBIOTIC_METABOLISM	0.406181	0.602502	0.0962406	-0.26588	-1.00481	165	AHCY	AKR1C3	GCLC	AKR1C2	HES6	SERPINE1	SLC22A1	SLC1A5	TMEM97	HSD11B1	GART	JUP	TDO2	SHMT2	VNN1	MTHFD1	SPINT2	GSR	AOX1	RBP4	KYNU	CYP2S1	ASL	PTGR1	ECH1	GCNT2	PTGES	NPC1	CBR1	HACL1	SMOX	CNDP2	GABARAPL1	PGD	LONP1	NQO1	POR	ACO2	ACSM1	IDH1	IRF8	GCH1	SSR3
HALLMARK_ADIPOGENESIS	0.398649	0.601351	0.09855	-0.26653	-1.01269	184	ATP1B3	SLC5A6	ACAA2	ABCA1	DHCR7	SCARB1	AK2	JAGN1	SOWAHC	IFNGR1	LPCAT3	UQCRC1	CYC1	SLC1A5	IMMT	PLIN2	SLC25A1	COL4A1	SLC19A1	ME1	ENPP2	PFKL	COQ3	SDHB	PPP1R15B	CDKN2C	ACADL	ORM1	COQ9	MRPL15	PTCD3	ECH1	SAMM50
HALLMARK_PEROXISOME	0.323529	0.50516	0.10714	-0.298609	-1.05865	94	CTPS1	TOP2A	IDH2	FDPS	DHRS3	DHCR24	ESR2	IDE	MSH2	SOD2	GNPAT	CLN6	HSD11B2	SMARCC1	FADS1	CEL	HRAS	ALDH1A1	SIAH1	ACOT8	ECH1
HALLMARK_EPITHELIAL_MESENCHYMAL_TRANSITION	0.309955	0.501563	0.114751	-0.278531	-1.05958	187	COL7A1	MEST	FBN2	SLC6A8	LAMA1	MATN2	GJA1	MMP3	SERPINE1	MCM7	GPC1	LAMC1	PMEPA1	COLGALT1	COL4A1	LAMA2	SFRP1	PPIB	LAMA3	ITGA5	MMP1	COL4A2	GREM1	LAMC2	ITGAV	SGCG	QSOX1	TGM2	COPA	SNAI2	PLOD2	COL6A3	LRP1	NTM	BASP1	PLOD1	TPM4	ITGB1	PLOD3	FSTL1	PVR	LOX	CXCL6
HALLMARK_BILE_ACID_METABOLISM	0.317427	0.504483	0.107554	-0.300953	-1.06181	91	SLCO1A2	IDH2	FADS2	ABCA3	BBOX1	ABCA1	NR1H4	DHCR24	PXMP2
HALLMARK_INFLAMMATORY_RESPONSE	0.216895	0.39681	0.141225	-0.290847	-1.1042	186	ADRM1	LAMP3	IL1A	ABCA1	GPC3	CCL24	SERPINE1	ATP2B1	SCN1B	IL18R1	SLC31A1	PDPN	OLR1	FZD5	HAS2	GNAI3	ITGA5	CCL7	TAPBP	P2RY2	CCRL2	ADM	SLC7A1	NOD2	IL1B	RNF144B	RAF1	CCL20	CD70	CALCRL	CD82	ACVR2A	IL10	LCK	CD14	PVR	SLC7A2	CXCL6	CSF3	TNFAIP6	ABI1	ATP2C1	KCNJ2
REACTOME_STING_MEDIATED_INDUCTION_OF_HOST_IMMUNE_RESPONSES	0.35	0.537069	0.104344	-0.491117	-1.1066	12	PRKDC	XRCC6
HALLMARK_GLYCOLYSIS	0.218468	0.39681	0.1396	-0.29118	-1.10704	188	CENPA	AURKA	KIF20A	DEPDC1	SLC25A13	CDK1	GCLC	GPC3	STC2	HMMR	ANG	COPB2	GPC1	NASP	PAXIP1	PSMC4	DSC2	GOT1	EGLN3	SOX9	CLN6	ABCB6	ME1	TPI1	FKBP4	B4GALT4	STMN1	HK2	EXT1	NANP	QSOX1	MERTK	EXT2	TXN	B4GALT2	PLOD2	AK4	PLOD1	ELF3	BIK	CHST4	AGRN	PGM2
GO_NEGATIVE_REGULATION_OF_INNATE_IMMUNE_RESPONSE	0.280514	0.462328	0.117766	-0.351052	-1.1106	51	MMP12	SERPINB4	GRN	TTLL12	YTHDF2	TYRO3	CR1	MUL1	A2M	RPS19	LILRB1	TNFAIP3	PARP14	SERPINB9	TREX1	VSIG4	CRK	NR1H3	ADAR	HAVCR2	SLAMF8
HALLMARK_P53_PATHWAY	0.20362	0.39396	0.145516	-0.292882	-1.11417	187	KLK8	KRT17	TPD52L1	SLC7A11	SERPINB5	CLCA2	GPX2	IL1A	PERP	PCNA	BAK1	CEBPA	SFN	SLC3A2	TP63	CDH13	ST14	SP1	LDHB	SEC61A1	ZNF365	RAP2B	TCHH	BLCAP	GM2A	TP53	RNF19B	EI24	ABHD4	PLK2	RXRA	WWP1	HRAS	NOL8	PTPN14	IRAK1	CD82	NOTCH1	ADA
HALLMARK_REACTIVE_OXYGEN_SPECIES_PATHWAY	0.267368	0.448977	0.119888	-0.355105	-1.11542	47	GCLC	ABCC1	SRXN1	SOD2	SBNO2	GSR	PRNP	GLRX2	TXN	PDLIM1	NDUFS2	PFKP	NQO1	EGLN2	GCLM	PRDX1	FES	PRDX6	ERCC2	OXSR1
GSE9650_NAIVE_VS_EXHAUSTED_CD8_TCELL_DN	0.19222	0.388808	0.151149	-0.299244	-1.129	172	HTR2C	ENTPD7	HOXD10	CPA3	MYCL	IL1A	PARP1	PERP	ZNF35	CIT	SERPINB2	HOXC6	GJA1	LAMC1	RBM15	LCN2	IMMT	MRPS18A	SHMT2	MOCOS	CCRL2	GTF3C4	NELFE	CLIC4	POLD2	ZNF436	COL19A1	BOP1	EPHB6	TGM2	SUB1	ADA	EFHD2	CTLA4	ST6GALNAC2	PTPN12	BNIP2	BCL2A1	SPOCK2
GSE45382_UNTREATED_VS_TGFB_TREATED_MACROPHAGES_UP	0.162162	0.357677	0.164406	-0.298735	-1.13505	184	NCAPH	AHCY	CHPT1	GINS3	GRAMD4	SMAD1	PRMT5	DNMT1	SLC37A2	DIP2B	ITPRIPL1	VCL	UQCRC1	GPRIN3	CHEK2	UCHL3	GNAI3	KIAA0930	SLC19A1	CALR	SYNE3	ZNF202	EIF4EBP1	TRIT1	PLXDC2	PLEKHF2	ARHGAP18	VPS45	POGK	PYCARD	MBOAT1	CCR1	ADCK2	PLOD3	MRPL4	BRPF1	TEP1	NAGA	CARD6	POLD1
GSE9650_EXHAUSTED_VS_MEMORY_CD8_TCELL_UP	0.154709	0.353053	0.168238	-0.302508	-1.14394	167	SPRR2A	HOXD10	MKI67	MYCL	IL1A	PARP1	PERP	ZNF35	HOXC6	PLA2R1	TG	TCF7L1	TFDP1	LAMC1	AARD	IMMT	SLC3A1	SHMT2	VNN1	FAM171A1	CCRL2	GTF3C4	MFHAS1	NELFE	CLIC4	SLC27A4	ITGAV	IL1RN	CEP250	SAPCD1	PTCH1	ST6GALNAC2	PLOD3	LCLAT1	SPOCK2	IL10	FSTL1
HALLMARK_ANDROGEN_RESPONSE	0.189765	0.388808	0.146416	-0.327465	-1.14405	88	ADRM1	PGM3	HMGCS1	CENPN	ABCC4	DHCR24	XRCC6	PMEPA1	INSIG1	GNAI3	CDK6	GSR	IQGAP2	FADS1	SRF	ITGAV	MERTK	SPCS3	HMGCR	SCD	ACTN1	IDI1	TMPRSS2	SMS	KRT19	KRT8	RAB4A	PIAS1	PA2G4	NGLY1	ELK4	NCOA4	UBE2J1	LMAN1	DBI	AKT1	ACSL3	ELL2	CAMKK2	MAF	SRP19	ALDH1A3
GSE9650_NAIVE_VS_EXHAUSTED_CD8_TCELL_UP	0.142534	0.342852	0.176694	-0.301209	-1.14585	187	KLK8	EYA2	IDH2	RPN1	TUBB	RNASEH2A	EXOSC7	HBS1L	IPO4	PPIF	C5orf34	MRPL37	EIF3B	DYM	SNRNP40	ABLIM1	SLC1A5	IKBKE	RBM38	SPNS1	HSD11B1	RTCB	GNPAT
GSE1925_CTRL_VS_24H_IFNG_STIM_IFNG_PRIMED_MACROPHAGE_UP	0.140909	0.342852	0.17822	-0.304467	-1.15686	182	SLC1A6	SLC5A1	CDH10	ITGA6	FOXD1	HES6	CTSV	ASF1B	DHRS3	CXADR	GNB4	LAPTM4B	CLDN1	COX6B2	COMMD2	LDHB	PSMB1	NUP50	LGALS4	RNF7	INSIG1	NR6A1	ARID3A	PTTG1	PDZK1	LETM1	DDX10	LARP4B	SCAF8	KCND2	C9orf85	CELSR1	ZCCHC3	ORM1	PTGR1	COMMD5	AK4	CHRNA6	ZNF354A	PSMC3IP	NLN	EEF2K	ANKRD1
HALLMARK_COAGULATION	0.150985	0.353053	0.168238	-0.324633	-1.16294	113	KLK8	MMP8	GDA	C8G	PREP	SERPINB2	CPB2	F12	P2RY1	CTSB	CTSV	ANG	MMP3	SERPINE1	HMGCS2	OLR1
GSE9650_EFFECTOR_VS_EXHAUSTED_CD8_TCELL_UP	0.121281	0.31288	0.193813	-0.308455	-1.16946	185	KLK8	TMEM45A	RACGAP1	PDIA6	RPN1	PRIM2	PPIF	WTAP	EBNA1BP2	EIF3B	GPC1	DYM	SLC1A5	HSD11B1	EFTUD2	PPIB	REPS1	PTTG1	FGFR3	HMCES	FCGR2B	XPNPEP1	EIF4A3	EIF2S1	USP5	DCPS	HNRNPAB	STK38	EIF6	TXNL4A	SSNA1	ARFRP1	SRPK1	TMEM147	TIAM1	CCR2	RPS6KA4	PRPSAP1	PSMB3	DPEP1	PSMB2	KCNJ8	CHFR
GSE9650_EXHAUSTED_VS_MEMORY_CD8_TCELL_DN	0.123043	0.31288	0.190023	-0.306968	-1.16948	190	KLK8	EYA2	RPN1	TUBB	YES1	RNASEH2A	EXOSC7	NDUFA9	MRPL37	CCT6A	APEX1	EBNA1BP2	TAF11	EIF3B	GPC1	IL18R1	DYM	SNRNP40	ABLIM1	WDR43	SLC1A5	IKBKE	GNPAT	SAE1	GM2A	HMCES	TAGLN2	FCGR2B	DERL2	NGDN	IMPDH2	IQGAP2	EIF2S1	STK38	PWP1	FBL	GLO1	ITPA	SRPK1	CCR2	PRPSAP1	PFKP	PIGU
HALLMARK_WNT_BETA_CATENIN_SIGNALING	0.199153	0.393879	0.142057	-0.39208	-1.17286	39	SKP2	NKD1	ADAM17	WNT5B	TP53	HDAC2	WNT6	NOTCH1	PTCH1	NCSTN	AXIN1	CUL1	DLL1
HALLMARK_COMPLEMENT	0.104545	0.281956	0.208955	-0.315085	-1.19715	183	MMP12	MMP8	PREP	SERPINB2	CTSB	PRSS3	CTSV	ANG	CDH13	SERPINE1	CASP3	GNB4	CTSL	LTF	SRC	F7	PLA2G7	OLR1	CR2	S100A9	GNAI3	ME1	XPNPEP1	LIPA	F5	GATA3	COL4A2	APOC1	CASP7	KLK1	CBLB	KYNU	RAF1	PPP4C	AKAP10	CR1	CLU	LRP1	USP14	MMP13	PIK3CG	PFN1	SPOCK2
HALLMARK_PANCREAS_BETA_CELLS	0.209877	0.39681	0.135741	-0.4725	-1.20784	19	PDX1	PAX6	HNF1A	SRPRB
GSE5099_MONOCYTE_VS_ALTERNATIVE_M2_MACROPHAGE_UP	0.1	0.278125	0.216543	-0.331301	-1.21999	145	A2ML1	APOBEC3B	KIF23	COL7A1	KRT23	RPP40	LINC01136	ERVH48-1	PRKG2	SLC41A3	FDPS	ATAD5	DNAJC13	LRP8	FBXO45	C1RL-AS1	PRKX	RARB	NOL9	SNHG17	SNRPA1	TP53BP2	PDRG1	DDX31	DGAT2	RBFA	LTBR	AGA
ISHIKAWA_STING_SIGNALING	0.188406	0.388808	0.144631	-0.656686	-1.29061	7	IRF6	IRF9
HALLMARK_CHOLESTEROL_HOMEOSTASIS	0.0746269	0.221393	0.24134	-0.387796	-1.30463	71	SQLE	ACAT2	HMGCS1	FASN	FADS2	FDPS	DHCR7	SREBF2	GLDC	ACSS2	TMEM97	FDFT1	CBS	EBP	CXCL16	ETHE1	HMGCR	CLU	ECH1	LSS	CD9	SCD	HSD17B7	IDI1
HALLMARK_PI3K_AKT_MTOR_SIGNALING	0.0570728	0.18141	0.321776	-0.384179	-1.3594	100	RIPK1	VAV3	CDK1	SFN	E2F1	TRAF2	SLC2A1	CDK2	MAP2K6	RIT1	HSP90B1	ACTR3	CALR	NCK1	MAP2K3	MAPKAP1	HRAS	YWHAB	RAF1	SMAD2	PFN1	TIAM1	CFL1	LCK	PAK4	PLCG1	PIK3R3	PPP1CA	CSNK2B	PDK1	ACACA
GSE45382_UNTREATED_VS_TGFB_TREATED_MACROPHAGES_DN	0.0128666	0.0500789	0.38073	-0.367143	-1.38204	173	TTK	SLC22A23	LMNB2	KIF2C	AURKA	HMGCS1	PRAME	SLC5A6	VCP	PTPN1	TMSB15B	LMNB1	MELK	STC2	CDK2	TBCC	XCL1	PLD2	SUZ12	SIAH2	DSC2	SOD2	NIM1K	LAD1	PIP5K1B	IL2RA	NFATC2IP	PDRG1	ANKRD33B	ZBTB5	APOL1	ZKSCAN5	ENTHD1	CD70	TMEM41A	SIAH1	PTGS2	HMGCR	MAP3K1	C4orf46	FSCN1	MAPKBP1	LXN
HALLMARK_FATTY_ACID_METABOLISM	0.0252205	0.0889927	0.352488	-0.377185	-1.38919	141	ACAT2	HMGCS1	ODC1	PPARA	ENO3	FASN	ACAA2	ADSL	SDHA	FH	DHCR24	ALDH3A2	CPT1A	APEX1	HSD17B10	RDH16	HMGCS2	TDO2	VNN1	IDH3B	G0S2	ME1	CEL	ALDH1A1	ACADL	CCDC58	DLST	ACOT8	GSTZ1	ECH1	HSD17B7	CBR1	IDI1	NCAPH2	SMS	ECHS1	GABARAPL1	MLYCD	CBR3	GRHPR	ACO2	IDH1	CA4
GO_REGULATION_OF_INNATE_IMMUNE_RESPONSE	0.00990822	0.0440916	0.38073	-0.35367	-1.40463	267	MMP12	MUC3A	RAET1G	PSMA7	POLR3B	PSME4	PTPN1	PSMB5	MALT1	IFNGR1	PSMB4	PRKDC	PSMD3	MUCL1	PSMA4	MUC12	XRCC6	PSMD2	PSMA3	MAVS	LRP8	PSMB1	SERPINB4	SRC	NRAS	IKBKE	TAB2	DHX9	NONO	CLEC4C	GRN	PSMC4	IKBKB	HMGB2	PSMD4	PSMB7	USP18	PSMD11	EP300	PSMC6	FCGR2B	MUC6	PSMC1
HALLMARK_ESTROGEN_RESPONSE_EARLY	0.0129417	0.0500789	0.38073	-0.37328	-1.41826	183	CA12	KLK10	TPD52L1	RAPGEFL1	SEC14L2	CHPT1	SLC16A1	FASN	ABCA3	CALB2	PPIF	SLC7A5	DHCR7	HR	STC2	SFN	GJA1	ISG20L2	SLC2A1	SCARB1	KRT15	DHRS3	KRT13	NXT1	ABLIM1	IGF1R	SLC24A3	SIAH2	FDFT1	TFAP2C	NRIP1	LAD1	KAZN	SLC37A1	UNC119	PODXL	FRK	P2RY2	PDZK1	FKBP4	KCNK15	CLIC3	FLNB
HALLMARK_OXIDATIVE_PHOSPHORYLATION	0.0107425	0.0455279	0.38073	-0.376814	-1.43169	183	IDH2	MRPS22	MTRR	AFG3L2	ACAA2	MRPS15	NDUFA9	SDHA	UQCRC1	FH	UQCRH	CPT1A	VDAC3	CYC1	HSD17B10	LDHB	IMMT	TIMM13	OAT	SLC25A20	PHB2	IDH3B	NDUFS6	MRPS11	SDHB	TIMM17A	CASP7	MRPS12	SLC25A3	DLST	FXN	NQO2	COX5A	MRPL15	ECH1	TIMM50	VDAC1	ETFA	GPI	NDUFS2	TOMM22	PMPCA	ECHS1
HALLMARK_DNA_REPAIR	0.0181396	0.0672678	0.352488	-0.390397	-1.44123	146	RAE1	ADRM1	NELFCD	RAD51	RFC4	UMPS	PRIM1	PCNA	POLR1C	FEN1	TYMS	ZWINT	RFC5	POLR2A	POLB	RFC2	ARL6IP1	SEC61A1	POLA2	GTF3C5	NELFE	TP53	SF3A3	POLR2H	IMPDH2
HALLMARK_APICAL_SURFACE	0.0691966	0.212362	0.287805	-0.487715	-1.44264	38	RHCG	NTNG1	ATP8B1	LYPD3	SCUBE1	SULF2	BRCA1	SHROOM2	GATA3	FLOT2	PKHD1	ADAM10
GO_POSITIVE_REGULATION_OF_INNATE_IMMUNE_RESPONSE	0.00629937	0.0311469	0.407018	-0.389796	-1.47986	186	MMP12	MUC3A	RAET1G	PSMA7	POLR3B	PSME4	PSMB5	MALT1	PSMB4	PRKDC	PSMD3	MUCL1	PSMA4	MUC12	XRCC6	PSMD2	PSMA3	MAVS	PSMB1	SRC	NRAS	IKBKE	TAB2	DHX9	NONO	CLEC4C	PSMC4	IKBKB	HMGB2	PSMD4	PSMB7	PSMD11	EP300	PSMC6	MUC6	PSMC1	PSMD14	PSMA6	HRAS	RAET1E	PSMD8	PSMB6	ZCCHC3
HALLMARK_UV_RESPONSE_UP	0.00529692	0.0277309	0.407018	-0.403053	-1.48421	145	GAL	CHRNA5	TFRC	RFC4	LHX2	NKX2-5	RPN1	BAK1	SLC6A8	CCNE1	FEN1	PPIF	HTR7	AMD1	CLCN2	CDK2	CTSV	CASP3	SHOX2	SOD2	CEBPG	DDX21	TCHH	BID	CREG1	GGH	CLTB	POLE3	FKBP4	EIF5	POLR2H
REACTOME_INNATE_IMMUNE_SYSTEM	5.85789e-07	6.5169e-06	0.659444	-0.344651	-1.49385	927	S100A7A	S100A7	PKP1	ATP6V1C2	CD177	PLD1	PI3	PGLYRP3	MMP8	RNASE7	PGLYRP4	DSC1	CALML5	SERPINA3	MS4A2	RIPK1	ILF2	VAV3	MUC3A	DSG1	TUBB	PSMA7	POLR3B	PSME4	VCP	C8G	PPP2R5D	YES1	DEFB4A	DSP	FLG2	DDOST	POLR1C	APOB	MYO10	PSMB5	DOCK1	FCN3	CPB2	MALT1	MLEC	TRAF2	CTSB
GO_ACTIVATION_OF_INNATE_IMMUNE_RESPONSE	0.00682009	0.0319467	0.407018	-0.41579	-1.52295	130	MUC3A	PSMA7	PSME4	PSMB5	MALT1	PSMB4	PRKDC	PSMD3	MUCL1	PSMA4	MUC12	XRCC6	PSMD2	PSMA3	MAVS	PSMB1	SRC	NRAS	TAB2	NONO	CLEC4C	PSMC4	IKBKB	PSMD4	PSMB7	PSMD11	EP300	PSMC6	MUC6	PSMC1	PSMD14	PSMA6	HRAS	PSMD8	PSMB6	ZCCHC3	RAF1	NLRC4	PYCARD	PSMA5
KEGG_CYTOSOLIC_DNA_SENSING_PATHWAY	0.0259979	0.0889927	0.352488	-0.506112	-1.5278	40	RIPK1	POLR3B	POLR1C	MAVS	IKBKE	IKBKB	IL1B	PYCARD	POLR3C	IL33	TREX1	NFKBIB	TBK1	ADAR
GO_INNATE_IMMUNE_RESPONSE	1.53967e-06	1.4102e-05	0.643552	-0.355863	-1.52982	763	S100A7	CD177	MMP12	APOBEC3B	PI3	PGLYRP3	KRT16	RNASE7	PGLYRP4	ULBP2	DMBT1	WFDC5	TRIML2	CCL18	SKP2	IGHD	MUC3A	RAET1G	TUBB	ULBP1	PSMA7	POLR3B	PSME4	PTPN1	C8G	TRIM29	YES1	GAPDH	TRIM15	CYP27B1	PSMB5	FCN3	STAR	IRF6	MALT1	F12	NR1H4	IGHV3-64	ZC3HAV1	IFNGR1	IGHV1-45	IGHV4-4	CCL24
GSE1925_CTRL_VS_24H_IFNG_STIM_IFNG_PRIMED_MACROPHAGE_DN	0.000513711	0.00351695	0.477271	-0.433403	-1.64673	184	KIF23	CDCA3	BLM	PLK1	RCC2	CDC25C	GMNN	INCENP	CHEK1	KDM5B	PRIM2	CCNE1	DIAPH3	MTHFD2	NDST1	FRRS1	AK2	WDHD1	IGF2R	GTPBP4	IL18R1	HDAC1	SLC1A5	NSD1	PDPN	RMND1	GNA13	AGTRAP	TAPBP	GGH	IL2RA	MFHAS1	RECQL	RBBP4	SMO	AKR1E2	ITGA4	ALDH1A1	EIF2AK3	ACADL	CRNKL1	ILF3	PDLIM1
HALLMARK_KRAS_SIGNALING_DN	0.00167554	0.00994151	0.45506	-0.459874	-1.69004	140	KLK8	KLK7	PKP1	SPRR3	AKR1B10	ENTPD7	KRT5	WNT16	CALML5	LGALS7	NPY4R	TGM1	BRDT	EDAR	LYPD3	DLK2	SLC5A5	DCC	SERPINB2	SKIL	HNF1A	KRT15	TG	TCF7L1	KRT13	CDKAL1	SHOX2	ADRA2C	TENM2	NR6A1	HSD11B2	ASB7	GTF3C5
HALLMARK_SPERMATOGENESIS	0.000958008	0.00609019	0.477271	-0.504653	-1.76308	88	TTK	NCAPH	KIF2C	AURKA	IL12RB2	RFC4	TOPBP1	BUB1	CCNB2	CDK1	CDKN3	NEK2	DCC	MTOR	EZH2	DMC1	CLPB	ELOVL3	SLC12A2	VDAC3	MTNR1A	IDE	DBF4
HALLMARK_UNFOLDED_PROTEIN_RESPONSE	0.000348972	0.00258821	0.498493	-0.496517	-1.76746	106	PDIA6	HYOU1	EIF4A1	NOP56	TUBB2A	EXOSC5	CKS1B	MTHFD2	XPOT	SLC7A5	STC2	PDIA5	SHC1	SRPRB	EXOSC2	DKC1	HSP90B1	CEBPG	PSAT1	EIF4G1	CALR	EDEM1	DDX10	EIF4A3	RRP9	EIF4EBP1	EIF2S1	FKBP14	WIPI1	EIF2AK3	DCP2	EXOSC10	SPCS3	IMP3	SSR1	PREB	ATF4	TATDN2	PAIP1	HSPA5	NHP2	SEC11A	CEBPB
KEGG_HOMOLOGOUS_RECOMBINATION	0.0039819	0.0221493	0.407018	-0.654571	-1.82284	26	RAD54L	BLM	RAD51	BRCA2	XRCC3	EME1	POLD2	TOP3A	POLD3	RAD54B	RAD51D	TOP3B	POLD1
HALLMARK_ESTROGEN_RESPONSE_LATE	1.58449e-06	1.4102e-05	0.643552	-0.516199	-1.95313	179	CA12	KLK10	GAL	CDC20	IMPA2	KLK11	TPD52L1	STIL	SERPINA3	KIF20A	PLK4	MEST	RAPGEFL1	TOP2A	IDH2	CHPT1	SLC16A1	PERP	CDC6	TPSAB1	TRIM29	RNASEH2A	ABCA3	PPIF	SLC7A5	DHCR7	HR	SFN	SCARB1	XRCC3	ALDH3A2	ST14	KRT13	LTF	NXT1	PRLR	GJB3	SLC24A3	HMGCS2	SIAH2	FDFT1	TFAP2C	S100A9
HALLMARK_MYC_TARGETS_V2	8.55674e-06	6.92318e-05	0.593325	-0.653563	-2.09897	58	PLK1	PLK4	MCM4	MCM5	GNL3	NOP56	TBRG4	EXOSC5	NOP2	IPO4	AIMP2	UNG	BYSL	WDR43	TMEM97	NDUFAF4	NOP16	SLC19A1	MRTO4	UTP20	RRP9	DCTPP1	HK2	PUS1	PPAN	IMP4	FARSA	SLC29A2	PPRC1	PES1	TCOF1	MPHOSPH10	CBX3	SUPV3L1	PHB	MYBBP1A	NPM1	TFB2M	PA2G4	SRM
ddr_sets	6.774e-10	1.20577e-08	0.801216	-0.531144	-2.11152	269	TTK	PARPBP	CDC25A	RAD54L	EXO1	BLM	RAD51	CDC25C	FANCI	RFC4	UBE2T	POLE2	TOPBP1	PARP1	FANCE	RRM2	PCNA	CHEK1	CHAF1A	BRIP1	DNA2	FANCD2	POLE	NEIL3	FANCB	DMC1	FEN1	TYMS	NHEJ1	EXO5	RFC5	RNF8	MAD2L2	RNF168	PPP4R4	POLB	BRCA2	FANCC	XRCC3	PRKDC	APEX1	BRCA1	GEN1
HALLMARK_MITOTIC_SPINDLE	1.42185e-09	2.10907e-08	0.788187	-0.5619	-2.14459	195	TTK	FBXO5	ESPL1	KIF23	CENPF	KIF11	KIF15	KIF2C	KIF4A	AURKA	DLGAP5	NDC80	CENPE	PLK1	TPX2	PRC1	NUSAP1	RACGAP1	TOP2A	SMC4	BUB1	KATNA1	KIF20B	INCENP	CCNB2	CDK1	BIRC5	LMNB1	NEK2	KIF22	NCK2	VCL	PIF1	KNTC1	BRCA2	CEP192	ECT2	ALS2	CENPJ	MAPRE1	TRIO	NCK1	SHROOM2
HALLMARK_MTORC1_SIGNALING	2.9174e-11	6.49122e-10	0.851339	-0.586191	-2.2373	195	CCNF	SQLE	CDC25A	AURKA	SLC7A11	PLK1	TFRC	MCM2	HMGCS1	BUB1	RPN1	RRM2	MCM4	GCLC	GAPDH	FADS2	PSMB5	MTHFD2	SLC7A5	PHGDH	DHCR7	SLC2A1	DHCR24	CCT6A	PSMA4	UNG	PSMA3	PSPH	GMPS	TUBG1	SLC1A5	PITPNB	RIT1	IMMT	TMEM97	PSMC4	GOT1	EGLN3	HSP90B1	INSIG1	EBP	SHMT2	PSAT1
ddr_sets_core	3.88454e-09	4.93891e-08	0.761461	-0.682111	-2.35439	80	EXO1	BLM	RAD51	FANCI	UBE2T	TOPBP1	PARP1	CHEK1	BRIP1	FANCD2	POLE	FANCB	FEN1	NHEJ1	POLB	BRCA2	FANCC	XRCC3	PRKDC	APEX1	BRCA1	GEN1	UNG	XRCC6	FANCA	MSH2	ATRIP	TDG	CHEK2	POLE3	EME1	POLQ	FANCM	PALB2
HALLMARK_MYC_TARGETS_V1	3.58887e-17	1.0647e-15	1.06721	-0.659481	-2.51857	194	CDC45	CDC20	CTPS1	KPNA2	CCNA2	RFC4	MCM2	CCT5	ILF2	ODC1	PSMA7	TCP1	PCNA	EIF4A1	MCM4	MAD2L1	MCM5	GNL3	EXOSC7	NOP56	BUB3	XPOT	DEK	AIMP2	TYMS	CCT3	CDK2	HDGF	CAD	RAN	CCT2	APEX1	PSMD3	TFDP1	PSMA4	MCM6	MCM7	G3BP1	VDAC3	XRCC6	CSTF2	CYC1	EIF3B
HALLMARK_E2F_TARGETS	1e-30	4.45e-29	NA	-0.785021	-2.99617	195	MYBL2	MCM3	ESPL1	CDC20	CTPS1	SPAG5	RAD51AP1	CDC25A	NCAPD2	CDCA3	KIF2C	KIF4A	BUB1B	AURKA	DLGAP5	HELLS	KPNA2	CSE1L	CENPE	PLK1	CDCA8	SPC25	GINS1	DEPDC1	TFRC	TIMELESS	UBE2T	RACGAP1	MCM2	DSCC1	PLK4	AURKB	MKI67	KIF18B	TOP2A	SMC4	GINS4	TUBB	RRM2	CCNB2	CDK1	CDKN3	GINS3
HALLMARK_G2M_CHECKPOINT	1e-30	4.45e-29	NA	-0.79556	-3.02034	186	HOXC10	CCNF	TTK	MYBL2	FBXO5	MCM3	CDC45	SQLE	ESPL1	CDC20	KIF23	E2F2	CENPA	CENPF	CDC25A	KIF11	KIF15	RAD54L	KIF2C	KIF4A	AURKA	EXO1	STIL	NDC80	KPNA2	CENPE	PLK1	TPX2	PRC1	CCNA2	NUSAP1	RACGAP1	MCM2	PLK4	AURKB	MKI67	TOP2A	SMC4	PBK	BUB1	KATNA1	ODC1	KIF20B
Pval: enrichment p-value, padj: Benjamini Hochberg adjusted P-value, log2err: expected error for the standard deviation of the P-value logarithm, ES: Enrichement Score, NES: Normalized Enrichement Score, Size: size of pathway after removing genes not present pathway
[truncated: 180 more columns]

## Sheet: S5
Supplemental Table S5. Gene Set Enrichment Analysis (Post-Treatment Tumor Samples)
Gene Set	pval	padj	log2err	ES	NES	Size	Leading Edge 1	Leading Edge 2	Leading Edge 3	Leading Edge 4	Leading Edge 5	Leading Edge 6	Leading Edge 7	Leading Edge 8	Leading Edge 9	Leading Edge 10	Leading Edge 11	Leading Edge 12	Leading Edge 13	Leading Edge 14	Leading Edge 15	Leading Edge 16	Leading Edge 17	Leading Edge 18	Leading Edge 19	Leading Edge 20	Leading Edge 21	Leading Edge 22	Leading Edge 23	Leading Edge 24	Leading Edge 25	Leading Edge 26	Leading Edge 27	Leading Edge 28	Leading Edge 29	Leading Edge 30	Leading Edge 31	Leading Edge 32	Leading Edge 33	Leading Edge 34	Leading Edge 35	Leading Edge 36	Leading Edge 37	Leading Edge 38	Leading Edge 39	Leading Edge 40	Leading Edge 41	Leading Edge 42	Leading Edge 43
HALLMARK_ALLOGRAFT_REJECTION	9.84518e-18	8.66376e-16	1.08644	0.573566	2.52337	184	CD96	ETS1	IL18RAP	ITK	KLRD1	CRTAM	CD8A	STAT4	CD3G	CD247	CD40LG	HLA-DQA1	PTPRC	IRF8	TRAT1	CD4	CD3E	CFP	CCR5	NCR1	IL2	PRKCB	ITGAL	ZAP70	IL12B	B2M	CD28	CTSS	IL2RA	HLA-E	LCK	IL10	MAP4K1	CD2	ELANE	IL12RB1	IGSF6	HLA-DOB	SIT1	ITGB2	HLA-DMB	CXCR3	HCLS1
KEGG_ANTIGEN_PROCESSING_AND_PRESENTATION	2.84622e-10	6.26169e-09	0.814036	0.672425	2.50658	63	KLRD1	KLRC4	CD8A	HLA-DQA1	HLA-DRB5	CD4	B2M	CTSS	HLA-DRB1	HLA-F	KLRC2	HLA-E	HLA-DQB1	HLA-B	KIR3DL1	HLA-DOB	HLA-DMB	NFYC	KLRC1	HLA-DOA	CD8B	HSPA1L	NFYB	KLRC3	CIITA	HLA-DPA1	CD74	LTA	HLA-DMA	HLA-DRA	TAP2	HLA-DPB1	HLA-A	CREB1	RFXAP
T_CELL_INFLAMMATORY_GEP	8.37952e-05	0.000460873	0.538434	0.741481	2.0913	18	CD8A	HLA-DQA1	HLA-DRB1	HLA-E	PDCD1LG2	CD27	CXCR6	CD274	CMKLR1	TIGIT	CCL5	STAT1	CXCL9	IDO1
GO_NEGATIVE_REGULATION_OF_INNATE_IMMUNE_RESPONSE	0.000131857	0.000682554	0.518848	0.530703	1.88576	52	CD96	NLRC5	NLRC3	HLA-F	HLA-E	TNFAIP3	NR1H3	HLA-B	CR1	SERPINB9	SAMHD1	IFI16	SLAMF8	HAVCR2	SERPING1	LGALS9	HLA-A	LILRB1
WIKMAN_ASBESTOS_LUNG_CANCER_DN	0.00146054	0.00584214	0.45506	0.586813	1.87158	29	GIMAP6	TRAT1	UVRAG	CCR2	ITGA4	MS4A6A	MAFB	NIPSNAP3B	FGL2	PRKACA	CD86	ATM
HALLMARK_INTERFERON_GAMMA_RESPONSE	8.28636e-08	7.292e-07	0.704976	0.421981	1.84759	195	KLRK1	NLRC5	STAT4	GBP4	HLA-DQA1	GPR18	IRF8	CASP8	BTG1	B2M	HLA-DRB1	CD69	TNFAIP3	HLA-B	BANK1	SP110	TXNIP	IL18BP	IL10RA	XAF1	NOD1	LAP3	NCOA3	EPSTI1	CD274	TRIM14	IL15	SAMHD1	CIITA	CMKLR1	EIF4E3	IL2RB	CCL5	SAMD9L	LYSMD2	IFI44L	IL15RA	CD74	SELP	STAT1	HLA-DMA	TDRD7	VCAM1
GSE45382_UNTREATED_VS_TGFB_TREATED_MACROPHAGES_UP	1.06461e-05	6.69184e-05	0.593325	0.392539	1.71352	186	INPP5D	MAPRE2	TSPAN32	ARHGAP17	TAGAP	EVL	LMO2	ARHGEF6	CASP8	CCR5	EMB	VASH1	LYL1	CD200R1	RGS18	BIN2	CD1C	ZFP36L2	SP110	CMTM3	ST6GAL1	ADCY7	XAF1	IL27RA	CALCOCO2	PARVG	CPPED1	PLEKHF2	PRKACB	MLKL	SNAI3	CCND3	PTGS1	NAGK	ARHGAP15	SLFN11	VAV1	PHF19	MIF4GD	FERMT3	CD99	LRRC8C	HAVCR2
HALLMARK_INTERFERON_ALPHA_RESPONSE	0.000575774	0.00253341	0.477271	0.414591	1.66763	95	SELL	GBP4	CASP8	ELF1	B2M	UBA7	LPAR6	SP110	TXNIP	LAP3	EPSTI1	TRIM14	IL15	SAMD9L	IFI44L	CD74	TDRD7	IFI44	NUB1	IRF2	PARP12	TMEM140	GBP2
GO_REGULATION_OF_INNATE_IMMUNE_RESPONSE	1.10147e-06	7.45611e-06	0.643552	0.36077	1.6488	276	FYN	KLRK1	CD96	KLRC4-KLRK1	IL18RAP	CD160	SLAMF6	CRTAM	NLRC5	MUC21	TXK	PYHIN1	STAT5B	CLNK	CLEC10A	PTPN22	NLRC3	NCR1	CARD11	RASGRP1	SH2D1A	IL12B	NCR3	HLA-F	HLA-E	CD226	TNFAIP3	NR1H3	HLA-B	CR1	SERPINB9	BIRC3	LEP	ICAM2	CREBBP	AIM2	TLR8	JAK1	APOE	CLEC4D	SAMHD1	LSM14A	LILRA2
WIKMAN_ASBESTOS_LUNG_CANCER_UP	0.00367807	0.0129468	0.431708	0.455257	1.63384	50	NLRC5	IRF8	HLA-DRB1	HLA-F	HLA-E	HLA-B	PDCD1LG2	JAK1	CD274	CIITA	HLA-DPA1	STAT1	PRF1	HLA-DRA	IRF4	TAP2	HLA-DPB1	HLA-A	IFNGR1	IRF2	CXCL9	FAS	IRF3	SOCS3
KEGG_TOLL_LIKE_RECEPTOR_SIGNALING_PATHWAY	0.00231249	0.00847912	0.431708	0.389165	1.53375	86	CASP8	IRAK4	IL12B	PIK3CD	TLR7	CCL4	TLR8	JUN	PIK3R5	CCL5	MAPK11	STAT1	CXCL9	PIK3R1	CTSK	IRF3	CD86	TLR4	IFNAR1	FOS	PIK3CG	TAB2	TRAF6	CD40	IL12A	CD80	TLR6	TLR9	TIRAP	RIPK1	MAP3K7	TNF	TAB1	IFNAR2	IRF5	AKT3	PIK3CA	TBK1
GO_POSITIVE_REGULATION_OF_INNATE_IMMUNE_RESPONSE	0.00048349	0.00223932	0.498493	0.335727	1.45716	193	FYN	KLRK1	KLRC4-KLRK1	IL18RAP	CD160	SLAMF6	CRTAM	NLRC5	MUC21	TXK	PYHIN1	STAT5B	CLNK	CLEC10A	CARD11	RASGRP1	SH2D1A	IL12B	NCR3	HLA-F	HLA-E	CD226	ICAM2	CREBBP	AIM2	TLR8	CLEC4D	LSM14A	LILRA2	SH2D1B	PRKACB	CCL5	VAV1	PLCG2	IFI16	CD209	IRGM	HAVCR2	CLEC6A	ICAM3
REACTOME_INFLAMMASOMES	0.0644342	0.135005	0.287805	0.487588	1.39447	20	NLRP1	TXNIP	AIM2	P2RX7	PSTPIP1	BCL2
HALLMARK_COMPLEMENT	0.00645581	0.0210412	0.407018	0.314141	1.38429	183	FYN	GNG2	LIPA	PRCP	CD40LG	GZMK	NOTCH4	RASGRP1	CDK5R1	APOBEC3F	CTSS	LCK	TNFAIP3	CR1	GATA3	GNAI2	WAS	LAP3	KCNIP2	APOC1	TIMP2	PIK3R5	ADRA2B	ITIH1	SH2B3	KLKB1	SPOCK2	COL4A2	APOBEC3G	ZEB1	CCL5	CBLB	CTSO	DOCK9	PLEK	CALM3	SERPING1	DOCK10	USP15	KLK1	HPCAL4	CASP9	CASP10
GSE1740_UNSTIM_VS_IFNA_STIMULATED_MCSF_DERIVED_MACROPHAGE_DN	0.0195147	0.0520393	0.352488	0.288986	1.24031	162	BTN3A1	NLRC5	GIMAP8	GBP4	HLA-DQA1	BTN3A2	NLRC3	HLA-DRB1	HLA-E	HLA-DQB1	HLA-B	GPR174	IL12RB1	STARD8	C12orf42	SCARF1	IQGAP2	EPSTI1	UPB1	F2R	SP140L	CDC42EP3	ZNF276	HLA-DPA1	ARHGAP15	SAMD9L	CD74	STAT1	SCML1	BDNF-AS	HLA-DRA	LINC00205	USP15	HLA-DPB1	HLA-A
HALLMARK_KRAS_SIGNALING_UP	0.0343307	0.0816515	0.321776	0.285813	1.23322	178	ETS1	FLT4	FUCA1	IKZF1	IRF8	TRAF1	CXCR4	HSD11B1	IL7R	CTSS	ENG	GPNMB	CD37	TNFRSF1B	ADAMDEC1	TNFAIP3	MAP4K1	PLVAP	PDCD1LG2	GPRC5B	LCP1	PTPRR	ITGB2	PRDM1	BIRC3	ST6GAL1	TSPAN7	IL10RA	IL2RG	TLR8	TRIB2	MAFB	NIN	CMKLR1	LAPTM5	ACE	USP12	TMEM100	DOCK2	FBXO4	MAP3K1	CBL	GYPC
HALLMARK_IL2_STAT5_SIGNALING	0.0249657	0.0627709	0.352488	0.279771	1.22071	191	SELL	PRKCH	EOMES	GBP4	CCR4	IRF8	TRAF1	ICOS	CD48	IL2RA	IL3RA	TNFRSF1B	IL10	TIAM1	SMPDL3A	FLT3LG	TLR7	CTLA4	IL10RA	PTH1R	NCOA3	GADD45B	CST7	S100A1	CD79B	SHE	CDKN1C	CCND3	IL2RB	SWAP70	SERPINB6	SELP	BCL2	TNFSF11	LRRC8C	CDC42SE2	SYT11	IRF4	RHOH	KLF6	ITGAE	GPR65	SOCS2
GSE9650_EFFECTOR_VS_EXHAUSTED_CD8_TCELL_UP	0.102768	0.200968	0.287805	0.269425	1.1761	186	KLRK1	ETS1	IL18RAP	KLRD1	LEF1	PRKCH	KLRG1	HSD11B1	ITGAL	PALD1	MFNG	TIAM1	PLD3	ZIK1	HCLS1	KLRC1	PIK3CD	ICAM2	DPEP1	CCR2	TMC6	ANXA6	ABCA2	ACP5
REACTOME_STING_MEDIATED_INDUCTION_OF_HOST_IMMUNE_RESPONSES	0.271795	0.451282	0.132846	0.440996	1.14708	13	NLRC3	NLRP4	IFI16	IRF3	STAT6	TBK1	TREX1
GSE9650_EXHAUSTED_VS_MEMORY_CD8_TCELL_DN	0.0885295	0.181177	0.287805	0.262965	1.1402	190	KLRK1	ETS1	IL18RAP	KLRD1	LEF1	SELL	FAM102A	PRKCB	ITGAL	IL7R	ITGB2	TTC7B	KLRC1	PIK3CD	ICAM2	ADCY7	CCR2	IQGAP2	ANXA6	ACP5	RERE	DGKA	CCND3	VAV1	BCL2	ITGB7	SMARCA2	KLF6	SATB1	ADD1	ARL6IP5	ST8SIA1	FCGR2B	TLE4	GM2A	IL18R1	CCDC115	MAP1LC3B	TDRP	ACSS1	PIK3R1	RHOA	ENTPD4
HALLMARK_APOPTOSIS	0.218045	0.383759	0.266351	0.256417	1.08829	152	LEF1	CASP8	CD69	PDCD4	CD2	CDKN1B	NEFH	ROCK1	HMOX1	BIRC3	BCL2L11	TXNIP	MADD	PLCB2	PMAIP1	CREBBP	JUN	GADD45B	TIMP2	BGN	F2R	GPX3	PEA15	CFLAR	PRF1	TIMP3	FASLG	SATB1	ADD1	CASP9	CASP2	PPT1	CYLD	IFNGR1
HALLMARK_APICAL_JUNCTION	0.427419	0.616605	0.193813	0.234311	1.00889	173	MAP4K2	SDC3	PTPRC	ATP1A3	CLDN15	TRAF1	EVL	ARHGEF6	CADM3	CD34	CLDN5	GNAI2	EPB41L2	ICAM2	SKAP2	CD274	VWF	SORBS3	RASA1	MAPK11	CD209	CADM2	CD99	NEXN	VCAM1	NFASC	PLCG1	ICAM4	RSU1	JAM3	ADRA1B	TSPAN4	THY1	CDH11	CD86	SYK
GSE9650_NAIVE_VS_EXHAUSTED_CD8_TCELL_UP	0.845455	0.929012	0.142901	0.201378	0.879436	188	SELL	PIP4K2A	FAM102A	EMB	PRKCB	HSD11B1	IL7R	ENG	PDE6A	PRKD2	KLF2	ST6GAL1	PIK3CD	CCR7	ADCY7	ACP5	S1PR4	RERE	DGKA	ACADM	PSAP	SESN1	CLK4	ITGB7	RNF38	GABBR1	SATB1	ADD1	FBXL3	RALGPS2	GM2A	EML5	EIF2B5	MAP1LC3B	TDRP	RAD17	HPCAL1	RGS10	GIT1	ISYNA1	USP24	PTPN6
HALLMARK_PI3K_AKT_MTOR_SIGNALING	0.895028	0.937648	0.103958	0.205674	0.817609	99	CAMK4	CXCR4	PRKCB	IRAK4	SLA	LCK	TIAM1	CDKN1B	IL2RG	NOD1	THEM4	FASLG	ACTR2	PLCG1	MKNK1	NCK1	RALB	PAK4	GRB2	VAV3	MKNK2	FGF17
KEGG_CYTOSOLIC_DNA_SENSING_PATHWAY	0.972145	0.981921	0.0300618	-0.210114	-0.604861	39	POLR3H	POLR3G	POLR1C
HALLMARK_UV_RESPONSE_DN	0.975439	0.981921	0.020416	-0.206371	-0.700311	136	F3	ERBB2	CDON	INSIG1	FHL2	SRI	LTBP1	SMAD3	ANXA2	ADORA2B	BMPR1A	BCKDHB	SLC22A18	HAS2	ITGB3	IGF1R	ANXA4	VLDLR	SLC7A1	MGMT	PTGFR	BDNF	RXRA	BHLHE40	ATP2C1	RND3	GJA1	DLG1	PDLIM5
GSE5099_MONOCYTE_VS_CLASSICAL_M1_MACROPHAGE_DN	0.981921	0.981921	0.0177815	-0.201412	-0.703941	182	COX6A1	MIF	EPHA2	AIMP2	SCARA5	NUF2	PLXNB2	UBAC1	PHKA1	HOXD8	HOXB6	PPP4C	ASF1B	PDXK	ERGIC3	CHEK1	HSBP1	SH3RF2	FBXW10	SMS	C1QBP	MSTO1	PTGR1	MXD1	NDUFAF6	CDC42BPG	DNMBP	GLRX5	EIF5A	DCAF13	ATAT1	CENPJ	ZBTB8OS	MFSD5	WDR1	HSPH1	TMA7	SMAD2	PRKAR1A	DTX2	SLC39A9	C1orf158	CCT7
HALLMARK_TGF_BETA_SIGNALING	0.878272	0.93118	0.031998	-0.239067	-0.732124	54	PMEPA1	CDH1	FURIN	TGIF1	SMAD3	SKIL	BMPR1A	PPP1CA	BMP2	CTNNB1	THBS1	IFNGR2	ID1	XIAP	TGFBR1
HALLMARK_HEDGEHOG_SIGNALING	0.855114	0.929012	0.0371479	-0.26011	-0.734854	34	CELSR1	SCG2	CNTFR	SHH	CDK6	VEGFA	VLDLR	ACHE	NRCAM	TLE3
HALLMARK_REACTIVE_OXYGEN_SPECIES_PATHWAY	0.831276	0.929012	0.036839	-0.259603	-0.770797	47	NQO1	SRXN1	PRDX2	TXNRD1	GCLC	GLRX2	TXN	NDUFA6	PRDX4	G6PD
GSE5099_MONOCYTE_VS_ALTERNATIVE_M2_MACROPHAGE_DN	0.87022	0.93118	0.0263245	-0.231233	-0.793665	158	TFF3	PLEKHS1	KCNV1	ESRP2	GMDS	CACNG6	ATP2A2	STON2	SERP1	CMYA5	CLPTM1L	SLC26A6	DYNLL1	LRRC1	ANKRD37	CCNA2	HIBCH	GREM2	PAIP1	RAET1E	GOLPH3	HSPA5	NPTN	CLN3	IMMP1L	STYXL1	VEGFA
HALLMARK_IL6_JAK_STAT3_SIGNALING	0.84359	0.929012	0.0329431	-0.24864	-0.796138	82	CXCL1	CSF2	CXCL11	CCL7	IL17RB	TNFRSF12A	CNTFR	CXCL3	IL1R2	BAK1	CRLF2
HALLMARK_COAGULATION	0.821901	0.929012	0.0311335	-0.245348	-0.818234	112	GDA	F3	PROC	DUSP14	KLK8	FURIN	MMP1	ANG	ARF4	C8B	CAPN5	FGG	PLAU
grasso_ifna	0.707783	0.830465	0.0473534	-0.301136	-0.824153	30	CXCL1	CXCL11
REACTOME_INNATE_IMMUNE_SYSTEM	0.951952	0.981921	0.010461	-0.219935	-0.831995	948	S100P	TCN1	CXCL1	DEFB1	CALML5	GSTP1	S100A9	MUC13	MUC5B	LCN2	SAA1	MUC3A	CD177	CEACAM6	RAB3D	BPIFA1	DSP	MUC4	PRSS3	FRK	SLC27A2	IGKV1-17	NKIRAS1	ABCA13	HEBP2	CEACAM3	ATP6V0A4	BPIFB2	PYGB	MIF	CRISP3	FOLR3	BPIFB1	SERPINA3	JUP	IMPDH2	POLR3H	POLR3G	LTF	RETN	AGPAT2	MUC16	IGLV6-57
GSE1925_CTRL_VS_24H_IFNG_STIM_IFNG_PRIMED_MACROPHAGE_DN	0.79435	0.919774	0.0297065	-0.245777	-0.858997	182	ATP1B1	CLDN7	MAP7	IER3	KIF23	FURIN	TM7SF2	KDM5B	CHADL	AK2	CDC25C	MFHAS1	GMNN	CDCA3	MNS1	NTMT1	GGH	LGALS3BP	NF2	ANXA2	S100A6	TMEM70	DNASE1L2	CHEK1	S100A11	MTHFD2	PLK1	SLC1A5	EIF2AK3	SMO	DIAPH3
KEGG_NOD_LIKE_RECEPTOR_SIGNALING_PATHWAY	0.631926	0.761774	0.0476387	-0.291255	-0.896158	57	CXCL1	CCL8	CCL7	HSP90B1	MAPK13
GO_ACTIVATION_OF_INNATE_IMMUNE_RESPONSE	0.673635	0.80108	0.0388759	-0.265977	-0.901376	133	FFAR2	MUC13	MUC5B	MUC3A	MUC4	MUC16	MUCL1	PSMD1	PSMA6	PSMB6	PSMB5	PSMC4	PSMD8	PSMD14	PSMA7	PSMD7	PSMB3	SRC	PSMB7	PSMB4	PSMD11	PSMD9	XRCC6	HRAS	PSMD4	PSMA4	MUC12	PSMB2	PSMD3	MUC1	SKP1	PSMD12	PSMC3	PAK3	PSMD2	PSMA5	PSMA3	PSMD10	HEXIM1	MUC20	PSMC1	MUC15
HALLMARK_WNT_BETA_CATENIN_SIGNALING	0.616573	0.753589	0.0516356	-0.313747	-0.903886	40	DKK1	WNT5B	FZD8	HDAC11
GSE1740_UNSTIM_VS_IFNA_STIMULATED_MCSF_DERIVED_MACROPHAGE_UP	0.615563	0.753589	0.0430173	-0.275164	-0.932509	133	LRRC73	KCNV1	PTPRF	WDR34	DTYMK	ENPP5	OPLAH	E2F7	EDA2R	SLC26A4-AS1	VPS18	FBXO2	PCDHB2	CHPF2	ZBED1	C6orf141	KEAP1	ZNF324	NRG4	TMEM147	PRTFDC1	HSF2BP	MCTP2	C4orf47	ZDHHC12	GCDH	SCYL1	STEAP2
GSE9650_NAIVE_VS_EXHAUSTED_CD8_TCELL_DN	0.611174	0.753589	0.0425023	-0.269825	-0.935882	168	NQO1	HOXD10	LCN2	HMGA2	CRISP2	CHL1	MOCOS	MRPS18A	FJX1	ST6GALNAC2	MRPL17	POLR2C	DPY30	POLD2	EPCAM	SHMT2	PCLO	NELFE	NDUFA13	ZNF35	ENTPD7	MRPS36	COPRS	MRPL48	ANXA3	SMIM4	VMP1	CKMT2	PAWR	YAP1	PRRC1	PHLDB2	SCAND1	BOP1	MRPS2	EFNB3	BHLHE40
GSE16385_UNTREATED_VS_12H_IL4_TREATED_MACROPHAGE_DN	0.564311	0.7197	0.046882	-0.279144	-0.957793	157	ILDR1	TMED3	ZNF750	DHX32	IRX3	FAT1	DNER	TMPRSS3	MRPL40	FAIM	FAM155A	DBNDD1	FOXP2	SPATA17	SLC35B1	SNX7	PSPH	MRPL18	ALG14	S100A14	RNF148	PDCL3	CASK	DCUN1D1	YIPF5	COQ10B	MAGEF1	PTK7	ABCD3	MAGOHB	KLHL7	PDP1	TNNT3	PNO1	UBE2L3	DCDC2	POP4	IER3IP1	PDCD10	HCCS	FAM50A
HALLMARK_APICAL_SURFACE	0.51532	0.666885	0.0596037	-0.335502	-0.965819	39	EFNA5	ATP6V0A4	ATP8B1	PCSK9
HALLMARK_ANGIOGENESIS	0.497183	0.666885	0.0618406	-0.345208	-0.979447	35	CXCL6	LRPAP1	JAG1	TNFRSF21	VEGFA
GSE16385_UNTREATED_VS_12H_IL4_TREATED_MACROPHAGE_UP	0.502278	0.666885	0.0514265	-0.283912	-0.988177	173	LPAR3	EFNA4	GSC	HEBP2	IQCE	MOCOS	CDH1	CHST9	NPM3	ACOT1	IL17RB	FOXM1	BCR	PHGDH	SF3B5	C4orf48	RNF183	IL1R2	PRSS22	CCHCR1	HOXB6	TUBB3	DYNC2H1	PDXK	OSCP1	S100A6	NFKBIL1	ANKRD35	EVPL	LRRC23	TRAIP	STARD4	PLA2G4F	CDC42BPG	TBC1D24	BAD
GSE9650_EXHAUSTED_VS_MEMORY_CD8_TCELL_UP	0.510832	0.666885	0.0507028	-0.285204	-0.989223	168	PRR15	CKMT1B	HOXD10	HSPA4L	HMGA2	ALCAM	DLG3	WNK2	ACKR3	NDUFS4	ST6GALNAC2	POLR2C	SCGB1A1	EPCAM	LCLAT1	MFHAS1	MKI67	SLC27A4	CXCR2	SHMT2	NELFE	PLA2R1	ZNF35	ADCY6	MRPL48	ANXA3	DHRS7B	VMP1	SURF4	CKMT2	PAWR	YAP1	NDUFB4	PRRC1	SPOCK1	SLC4A8
HALLMARK_PANCREAS_BETA_CELLS	0.451128	0.64031	0.0697793	-0.37907	-0.995096	23	PDX1	HNF1A	SRPRB	VDR	PAX6	SRP9	PAK3	SEC11A
HALLMARK_MYOGENESIS	0.472665	0.649915	0.0542316	-0.288983	-1.00565	172	BDKRB2	NQO1	SPDEF	KLF5	EPHB3	SLC6A8	NAV2	PC	AGRN	PLXNB2	PPFIA4	TNNI2	PVALB	SCD	TPD52L1	EFS
HALLMARK_INFLAMMATORY_RESPONSE	0.461453	0.644569	0.0544556	-0.286449	-1.00711	186	CXCL6	FFAR2	LIF	ITGB8	SLC7A2	INHBA	TPBG	F3	SLC4A4	PROK2	BDKRB1	GNA15	OSM	CXCL11	CCL7	TNFAIP6	ATP2A2	CD55	CCL20	PCDH7	SRI	NAMPT	ADRM1
HALLMARK_MITOTIC_SPINDLE	0.408027	0.608582	0.0601186	-0.291864	-1.03059	194	NET1	KIF23	ECT2	AURKA	CENPF	PRC1	ESPL1	KIF4A	TOP2A	CTTN	SAC3D1	TTK	BCR	CDK1	CENPE	ANLN	KATNB1	BIRC5	KIF22	KIF2C	KIF3B	NEK2	ARFIP2	CCNB2	NUSAP1	TPX2	KIF15	RACGAP1	PLK1	PIF1	ALS2	CEP72	ARHGAP5	ARHGEF11	STAU1	KIF11	NDC80	LMNB1	INCENP	BUB1	DST	EZR	SMC4
HALLMARK_NOTCH_SIGNALING	0.41534	0.609165	0.0720033	-0.375261	-1.0394	31	PSENEN	CCND1	WNT5A	FZD5	LFNG	JAG1	DTX4	SKP1	DTX2	TCF7L2	RBX1	HES1
HALLMARK_HEME_METABOLISM	0.38041	0.577174	0.0645031	-0.30031	-1.0451	174	ABCB6	SLC6A8	AQP3	ALDH1L1	MOCOS	SLC22A4	SLC7A11	OSBP2	PRDX2	SLC4A1	MGST3	PC	HDGF	XK	SLC2A1	IGSF3	HMBS	HBB	MFHAS1	GCLC	UBAC1	P4HA2	MINPP1	ADIPOR1	SMOX	ANK1	FN3K	TFDP2	PSMD9	DCUN1D1	FBXO34	BSG	BPGM	PDZK1IP1	GLRX5	SLC6A9	GMPS	UROS	ELL2
HALLMARK_PROTEIN_SECRETION	0.378141	0.577174	0.0696133	-0.322053	-1.04865	94	NAPG	TOM1L1	KRT18	SGMS1	CLTA	TMED2	BNIP3	RAB22A	ERGIC3	TSPAN8	COPB2	GOLGA4	PAM	ARF1	YIPF6	DST	COPE	GBF1	RAB2A	YKT6	SOD1	ARFGAP3	SCAMP1	SCAMP3	VPS45	ATP6V1H	ATP6V1B1	COPB1	ATP1A1	USO1	ARFIP1	SCRN1	SEC24D	ZW10	OCRL	BET1	ARCN1	CD63	TSG101	GNAS	CLTC	TMED10	AP2S1
HALLMARK_TNFA_SIGNALING_VIA_NFKB	0.305122	0.479478	0.0743625	-0.305788	-1.08017	193	CXCL1	CXCL6	LIF	INHBA	F3	TUBB2A	IER3	PMEPA1	CSF2	RNF19B	ACKR3	FJX1	CXCL11	TNFAIP6	DUSP4	FOSL1	CXCL3	CCL20	SDC4	G0S2	PHLDA2	CCND1	TGIF1	NAMPT	SMAD3	PLAU	KYNU	NR4A3	MXD1	JAG1	PANX1	PLAUR	PTPRE	CCL2	YRDC	VEGFA	PTX3	PTGS2	SPHK1	EFNA1	NFE2L2	BHLHE40	BMP2
GSE5099_MONOCYTE_VS_ALTERNATIVE_M2_MACROPHAGE_UP	0.277389	0.452042	0.0817516	-0.327322	-1.1146	145	KRT23	NQO1	SPR	KIF23	SPATA24	NRTN	HKDC1	RNF157-AS1	SCG2	PCDHB2	ZNF483	NIPSNAP1	ZNF771	SCGB1A1	LSR	WNK3	EVC2	ZNF593	APOBEC3B	FFAR3	FDPS	COPRS	PIK3R2	NT5E	SLC41A3	CDH2	HSF2BP	GAS5	CYP2F1	DLAT	KLHDC7B	GLB1L2	SLC4A8	RPS6KL1
GSE9650_EFFECTOR_VS_EXHAUSTED_CD8_TCELL_DN	0.25	0.423077	0.0862866	-0.32313	-1.11868	167	IRF6	SIX1	NQO1	HMGA2	CRISP2	FRK	PHLDA3	NKIRAS1	PTK6	PIK3C2G	CHL1	SLC7A11	NSDHL	ATP2A2	POLR2C	H19	EPCAM	LCLAT1	ZNF239	SLC12A2	EFS	PCLO	NELFE	NDUFA13	ZNF35	COPRS	MRPL48	ANXA3	PER2	SMIM4	CKMT2	IGF1R	PAWR	YAP1	PHLDB2	SCAND1	LIN9	MRPS2	EFNB3
HALLMARK_UV_RESPONSE_UP	0.243275	0.419768	0.0891647	-0.332043	-1.12876	144	TST	SPR	SLC6A8	AQP3	MAPK8IP2	HTR7	FURIN	CYB5R1	IGFBP2	MRPL23	EPCAM	ALDOA	GGH	FKBP4	FEN1	PPIF	STIP1	BAK1	SLC25A4	GRPEL1	RPN1	FGF18	C4BPB	POLR2H	CYB5B	BSG	CLTB	CDKN2B	RFC4	DDX21	ALAS1	CLCN2	NAT1	BMP2	PSMC3	AMD1	SQSTM1	BTG3	YKT6	PDAP1	SHOX2
KEGG_HOMOLOGOUS_RECOMBINATION	0.298351	0.477361	0.0916795	-0.425919	-1.13559	25	RAD54L	POLD2	EME1	XRCC3	RAD54B	SSBP1	RAD51	RAD50	POLD1
GSE1925_CTRL_VS_24H_IFNG_STIM_IFNG_PRIMED_MACROPHAGE_UP	0.175737	0.315609	0.10673	-0.331529	-1.15837	183	CLDN1	COX6B2	LMX1B	HAL	CELSR1	CXADR	LAPTM4B	ARX	SLC5A1	FOXD1	INSIG1	CNTN3	NGRN	RNF7	DHRS3	ORM1	PTTG1	ASF1B	LETM1	GAS8	WRNIP1	NUP35	FAH	PTGR1	PRDX4	NR6A1	DBN1	UBA5	ARID3A	JTB	UBL5	BPGM	VLDLR	ANKRD1	UROS	LDHB	TMCO1	KLHL7	ATP6V1G1	COMMD5	C11orf1	AK4	PSMC3IP
GSE45382_UNTREATED_VS_TGFB_TREATED_MACROPHAGES_DN	0.169704	0.311124	0.10925	-0.336128	-1.16992	173	MSMO1	KLF5	HMGCS1	HMGCR	MIA	LAD1	AURKA	TLCD1	TNFAIP6	LMNB2	TMEM41B	MELK	GNE	TTK	TTC39A	KLC2	ORMDL2	PPP2R3A	DSC2	KIF2C	TMEM41A	SGPP2	BAIAP2L1	NXT2	SPAG16	CCDC127	MPC2	DNAI2	VANGL1	HMGN2P46	IGSF8	VCP	PPP2R1B	ALG2	SRD5A1	MRPL49	SRSF12	APOL1	SLC22A23	PRRG4	PTGS2	TPST1	LMNB1
HALLMARK_BILE_ACID_METABOLISM	0.146163	0.273667	0.123842	-0.366947	-1.21049	99	FADS2	SLC27A2	BBOX1	PRDX5	FADS1	PXMP2	PEX13	SLC35B2	FDXR	SLC23A1	BMP6	NR1I2	AMACR	SLC22A18	NUDT12	TFCP2L1	ISOC1	IDH2	DHCR24	RETSAT	PEX11G	DIO2	EFHC1	DIO1	RXRA	ABCD3	PEX7	PEX6	AR	SOD1	CYP39A1	AQP9	GNPAT	SLC27A5	GCLM
HALLMARK_HYPOXIA	0.101695	0.200968	0.145516	-0.352183	-1.22889	177	HS3ST1	INHA	HAS1	TPBG	B4GALNT2	TMEM45A	F3	IER3	GPC1	CP	SLC25A1	PRDX5	CA12	MIF	GCNT2	EFNA3	ACKR3	FAM162A	SLC2A1	ENO1	LDHA	SDC4	PPFIA4	TPI1	ALDOA	TKTL1	P4HA2	ANXA2	GAPDH	ADORA2B	TES	HDLBP
HALLMARK_ADIPOGENESIS	0.0381166	0.08827	0.245042	-0.375796	-1.32065	187	DHCR7	TST	NKIRAS1	RAB34	COX6A1	UQCRQ	SLC25A1	SLC25A10	RETN	COX7B	COX8A	UQCR10	UQCRC1	MGST3	ECHS1	SOWAHC	TKT	COQ9	AK2	ALDOA	CYC1	ORM1	NDUFAB1	ESRRA	DDT	HIBCH	QDPR	ATL2	ADCY6	GRPEL1	SLC1A5	REEP6	FAH	MDH2	DHRS7B	NDUFB7	MRPL15	MTCH2	PIM3	RETSAT	JAGN1	DLAT	PTGER3
HALLMARK_DNA_REPAIR	0.0465658	0.102445	0.224966	-0.393122	-1.33882	146	CETN2	CCNO	UMPS	IMPDH2	ZWINT	MRPL40	POLR2I	POLR2C	COX17	SAC3D1	POLR1C	NME1	SEC61A1	FEN1	TMED2	ADRM1	PCNA	MPC2	POLB	NELFE	ADCY6	RAE1	RFC2	EDF1	DAD1	TYMS	TAF13	POLR2H	POLR2F	RFC4	RAD51	POLR2K	GTF2A2	POLR2J	DDB1	POLD1	NELFCD	ALYREF	ERCC2	GTF3C5	TAF9	SNAPC5	NUDT9
HALLMARK_P53_PATHWAY	0.0290499	0.0710109	0.352488	-0.386689	-1.35149	182	GPX2	LIF	SDC1	SFN	HSPA4L	PHLDA3	IER3	ST14	CDKN2A	RNF19B	EPHA2	SLC7A11	KLK8	TRAF4	FAM162A	TRIB3	AEN	FDXR	PLXNB2	EI24	SEC61A1	ZNF365	TPD52L1	NHLH2	PCNA	EPS8L2	NUDT15	BAK1	SLC3A2	DCXR	MDM2	TRIAP1	SLC19A2	GLS2	MXD1	RETSAT	HRAS	CDKN2B	PTPRE	SERTAD3	IRAK1	SPHK1	VDR
HALLMARK_EPITHELIAL_MESENCHYMAL_TRANSITION	0.0246938	0.0627709	0.352488	-0.3888	-1.36696	186	CXCL1	CXCL6	SDC1	SFRP1	DKK1	INHBA	PFN2	SLC6A8	GPC1	PMEPA1	FZD8	PCOLCE2	PDLIM4	QSOX1	IGFBP2	SCG2	MMP1	MFAP5	APLP1	PPIB	TNFRSF12A	SDC4
WIKMAN_ASBESTOS_LUNG_CANCER_UP	0.105845	0.202486	0.170932	-0.57143	-1.37468	16	WFDC2	SLC44A4	LRPAP1	CTBP2
ddr_sets	0.00851893	0.025775	0.38073	-0.380219	-1.37562	266	CETN2	UBE2T	GTF2H2	RAD54L	CDC25A	MRPL40	RECQL4	SOX4	MNAT1	H2AFX	AEN	APITD1	TTK	POLD2	EXO1	CDC25C	CDK7	FEN1	CHEK2	PPP4C	DNA2	SHFM1	PCNA	NUDT15	SWI5	CHAF1A	POLQ	WEE1	POLB	CHEK1	EME1	NEIL3	RRM1	MPLKIP	RFC2	TCEB1	TYMS	FANCI	XRCC3	PAXIP1	PPP4R1	XRCC6	RAD54B
ddr_sets_core	0.0430248	0.0970815	0.248911	-0.437505	-1.39029	78	UBE2T	EXO1	FEN1	CHEK2	SHFM1	POLQ	POLB	CHEK1	EME1	FANCI	XRCC3	XRCC6	RAD51	RAD50	FANCA	BRCA1	TP53BP1	MGMT	ERCC2	TDG	BRIP1	UNG	POLE	BARD1	MSH2	PMS2	REV1	XRCC2	XRCC4	MUS81	POLL	PRKDC
HALLMARK_XENOBIOTIC_METABOLISM	0.0109906	0.031199	0.38073	-0.401206	-1.39622	174	SPINT2	NQO1	TMEM97	AKR1C3	CYP2J2	DDC	UGDH	CBR1	ADH7	HSD17B2	GCNT2	PTS	EPHA2	PTGES	JUP	PC	SAR1B	PGRMC1	AHCY	ARG2	ATP2A2	GSTA3	LONP1	ACOX3	SLC22A1	GCLC	PYCR1	SLC35B1	SHMT2	KYNU	DDT	CYP2S1	DCXR	SMOX	SLC1A5	FAH	PTGR1	BPHL	SSR3	RETSAT	ADH1C	ALAS1	AOX1
HALLMARK_PEROXISOME	0.0150336	0.0413425	0.38073	-0.442419	-1.45945	99	SLC27A2	HSD11B2	PRDX5	CEL	FADS1	PEX13	FABP6	TOP2A	SCGB1A1	SLC35B2	DHRS3	CDK7	NR1I2	SLC25A17	TSPO	SLC25A4	RDH11	FDPS	CTPS1	ISOC1	IDH2	DHCR24	RETSAT	HRAS	DIO1	ABCD3	PEX6	FIS1	SOD1	GNPAT	NUDT19	ABCB9	MSH2	ACOX1	MVP	SULT2B1	IDE	SIAH1	IDI1	ACOT8	HSD17B11	SLC25A19	CLN6
HALLMARK_SPERMATOGENESIS	0.00878694	0.025775	0.38073	-0.451931	-1.47933	96	HSPA4L	CRISP2	PCSK1N	MAP7	ALOX15	MTNR1A	AURKA	OAZ3	CLGN	TTK	CDK1	TKTL1	KIF2C	TEKT2	MLF1	NEK2	ART3	CCNB2	SLC12A2	NF2	PACRG	CLPB	PSMG1	NPHP1	ZC3H14	TNNI3	CCNA1	ELOVL3	PHKG2	PCSK4	VDAC3	RFC4	NCAPH	TALDO1
ISHIKAWA_STING_SIGNALING	0.0615114	0.132025	0.24134	-0.760294	-1.4833	7	IRF6
HALLMARK_ANDROGEN_RESPONSE	0.00679676	0.0213612	0.407018	-0.465937	-1.50948	91	SPDEF	HMGCS1	HMGCR	MAP7	PMEPA1	KRT19	BMPR1B	FADS1	INSIG1	UAP1	PGM3	KRT8	VAPA	SCD	CCND1	SRF	CENPN	CDC14B	ADRM1	MAK	NKX3-1	SORD	ACSL3	CDK6	SMS	RAB4A	SRP19	DHCR24	XRCC6	RRP12	HOMER2
HALLMARK_KRAS_SIGNALING_DN	0.00456001	0.0154339	0.407018	-0.446008	-1.51719	138	AKR1B10	RIBC2	KLK7	KRT15	CALML5	DLK2	MAGIX	HNF1A	GPRC5C	HSD11B2	CDH16	BMPR1B	FGFR3	CAPN9	KLK8	SPTBN2	IGFBP2	PRODH	KRT4	SOX10	SCGB1A1	CD207	CNTFR	C5	SKIL	TNNI3	CCNA1	TGM1	SLC6A3	LFNG	ENTPD7	HTR1B	EPHA5	TFCP2L1
HALLMARK_UNFOLDED_PROTEIN_RESPONSE	0.000872352	0.00365557	0.477271	-0.490038	-1.62183	106	TUBB2A	SLC7A5	CHAC1	EXOSC4	CKS1B	HYOU1	DNAJA4	ALDH18A1	XBP1	PSAT1	SERP1	SLC1A4	SRPRB	HSP90B1	NHP2	HSPA9	YIF1A	SHC1	LSM4	PAIP1	MTHFD2	EIF4EBP1	EIF2AK3	HSPA5	CALR	PDIA6	CCL2	VEGFA	EIF4G1	RRP9	DKC1	NOLC1	EIF4E	LSM1	EXOSC1	DNAJC3	NOP14	KIF5B	SEC11A	POP4	EIF4A1	BANF1	ATF4
HALLMARK_FATTY_ACID_METABOLISM	0.000223255	0.00109147	0.518848	-0.478425	-1.62869	142	HMGCS1	ACAT2	CBR3	UGDH	BMPR1B	CBR1	ADH7	MIF	PTS	CEL	FASN	NSDHL	FH	ODC1	ECHS1	NCAPH2	LDHA	G0S2	SLC22A5	ALDOA	CCDC58	ECI1	HSD17B10	HIBCH	BCKDHB	RDH11	SMS	REEP6	MDH2	BPHL	DHCR24	RETSAT	ADH1C	SDHA	GCDH	UROS	ADSL	HSD17B7	HADH	HSPH1	OSTC	GSTZ1	PCBD1
GSE5099_MONOCYTE_VS_CLASSICAL_M1_MACROPHAGE_UP	8.17785e-05	0.000460873	0.538434	-0.486894	-1.67118	158	ST6GALNAC1	FGL1	MARVELD3	FA2H	PADI3	ETV4	CXADR	PHLDA3	ANKEF1	DNAH7	CDC45	AURKA	CES4A	DUSP4	SPATA17	DOCK5	ALPK3	MARK1	IFFO2	PDP2	KIF12	IFRD2	FKBP4	CCHCR1	YIF1A	DYNC2H1	SPAG6	NKX3-1	CLIC1	HOGA1	A4GALT	CYP2S1	MDM2	SEC61B	PLK1	MDH2	NT5E	PDZD11	KCNE4	TRAIP	PRPF19	LYPLA2	NDUFV3
HALLMARK_MYC_TARGETS_V2	0.0022302	0.00847912	0.431708	-0.546011	-1.68623	58	TMEM97	AIMP2	IPO4	SLC29A2	GNL3	BYSL	PHB	SORD	MCM4	NOP16	UTP20	PLK1	DCTPP1	FARSA	MRTO4	PLK4	CDK4	HSPE1	RRP12	TFB2M	HSPD1	RRP9	NOLC1	HK2	TBRG4	GRWD1	PES1	NIP7	UNG	PA2G4	PPRC1	SRM	NDUFAF4	CBX3	NOP56	NPM1
HALLMARK_E2F_TARGETS	1.18649e-07	9.4919e-07	0.704976	-0.531935	-1.87901	193	SPAG5	TRIP13	UBE2T	CDKN2A	GINS4	AURKA	UBE2S	CKS1B	POP7	SPC24	CDC25A	CKS2	ESPL1	KIF4A	TOP2A	MELK	GINS1	CDK1	POLD2	AK2	CENPE	ORC6	BIRC5	KIF22	MCM2	NME1	MKI67	KIF2C	CDCA3	KIF18B	PTTG1	CDC20	CCNB2	CHEK2	HMGA1	MAD2L1	WDR90	ASF1B	TUBG1	PCNA	TIPIN	WEE1	PAICS
HALLMARK_MYC_TARGETS_V1	4.04668e-08	3.95675e-07	0.719513	-0.542	-1.91384	194	RUVBL2	CDC45	IMPDH2	AIMP2	ODC1	VDAC1	HDGF	MRPL23	CCT3	PSMD1	CSTF2	POLD2	LDHA	PSMA6	MCM2	SNRPG	NME1	GNL3	CYC1	CCT5	NHP2	CDC20	NDUFAB1	PSMC4	MAD2L1	PSMD8	PHB	PSMD14	PCNA	EXOSC7	PSMA7	EIF2S2	PSMD7	SNRPD1	CCNA2	TUFM	MCM4	RPLP0	PSMB3	NOP16	ETF1	RRM1	SNRPD3
HALLMARK_ESTROGEN_RESPONSE_EARLY	3.23876e-08	3.56263e-07	0.719513	-0.548022	-1.92676	186	TFF1	TFF3	KRT15	SFN	DHCR7	TJP3	TFAP2C	SLC7A2	CELSR1	KLK10	FDFT1	TPBG	SEC14L2	OVOL2	RHOD	CLDN7	FRK	SLC27A2	AQP3	SLC7A5	KRT19	LAD1	ESRP2	NAV2	CA12	PTGES	TSKU	MLPH	GREB1	TMPRSS3	FASN	FHL2	IL17RB	KCNK15	XBP1	KRT18	SLC2A1	KRT8	TTC39A	SLC1A4	SLC37A1	SLC22A5	CCND1
HALLMARK_OXIDATIVE_PHOSPHORYLATION	2.43562e-09	3.57224e-08	0.774939	-0.559294	-1.95735	184	ATP1B1	COX6A1	UQCRQ	NDUFA4	COX7B	COX8A	TIMM13	UQCR10	UQCRC1	MGST3	NDUFS4	FH	ECHS1	UQCRH	VDAC1	COX5B	OAT	COX17	LDHA	NDUFS6	VDAC2	NDUFV2	COX7A2	MTX2	CYC1	NDUFAB1	CASP7	NDUFS8	COX6C	COX6B1	HSPA9	MRPS15	PDHX	ECI1	UQCRFS1	NDUFC2	HSD17B10	NDUFB3	MRPS12	SLC25A4	GRPEL1	TIMM17A	NDUFC1
HALLMARK_G2M_CHECKPOINT	3.10369e-09	3.90179e-08	0.774939	-0.5625	-1.97677	187	SQLE	EFNA5	SLC7A5	HOXC10	KIF23	CDC45	DTYMK	AURKA	UBE2S	E2F1	PBK	CKS1B	RAD54L	CDC25A	CENPF	PRC1	CCNF	CKS2	ODC1	ESPL1	GINS2	KIF4A	MNAT1	TOP2A	CDC6	TTK	CDK1	EXO1	CENPE	CENPA	ORC6	TROAP	BIRC5	KIF22	MCM2	MKI67	KIF2C	CCND1	PTTG1	NEK2	CDC20	CCNB2	HMGA1
HALLMARK_MTORC1_SIGNALING	2.26076e-10	6.26169e-09	0.826657	-0.574703	-2.03008	193	SQLE	CYP51A1	DHCR7	TMEM97	HMGCS1	HMGCR	FADS2	EBP	SLC7A5	SLC7A11	AURKA	POLR3G	TM7SF2	FADS1	CDC25A	INSIG1	CCNF	SDF2L1	XBP1	TRIB3	PSAT1	EEF1E1	ATP2A2	ACACA	SLC2A1	ENO1	SERP1	TXNRD1	LDHA	HMBS	FDXR	EGLN3	PHGDH	SLC1A4	TPI1	MCM2	ALDOA	HSP90B1	SCD	GCLC	NAMPT	PSMB5	PSMC4
HALLMARK_GLYCOLYSIS	4.65281e-10	8.18894e-09	0.814036	-0.581877	-2.04291	185	TFF3	SOX9	SDC1	TPBG	GALE	ABCB6	IER3	GPC1	GMPPB	BIK	CHST6	PYGB	SLC25A10	HOMER1	CLDN3	MIF	CHPF	AURKA	EFNA3	B4GALT4	QSOX1	KIF20A	NSDHL	B4GALT2	PC	ANG	FAM162A	NOL3	GNE	CHPF2	AGRN	ENO1	CDK1	LDHA	EGLN3	CENPA	PPFIA4	TPI1	B3GNT3	ALDOA	TKTL1	PKM	DSC2
HALLMARK_CHOLESTEROL_HOMEOSTASIS	2.38926e-07	1.75212e-06	0.674963	-0.661692	-2.07003	70	SQLE	CYP51A1	DHCR7	TMEM97	HMGCS1	HMGCR	FDFT1	FADS2	ALCAM	MVK	ACAT2	EBP	SREBF2	TM7SF2	FASN	NSDHL	ETHE1	MAL2	TRIB3	TNFRSF12A	PCYT2	SCD	AVPR1A	ACTG1	S100A11	FDPS	MVD	STARD4	JAG1	PLAUR	FABP5	HSD17B7	CD9	CBS	CTNNB1
HALLMARK_ESTROGEN_RESPONSE_LATE	1.9557e-12	8.6051e-11	0.898671	-0.610179	-2.13343	180	TFF1	TFF3	TRIM29	SFN	PKP3	DHCR7	TJP3	S100A9	TFAP2C	HSPA4L	KLK10	DNAJC12	FDFT1	AGR2	TST	TPBG	CYP4F11	OVOL2	GALE	FRK	SLC27A2	UGDH	ST14	NMU	DLG5	SLC7A5	KRT19	FGFR3	CDH1	CA12	SERPINA3	PTGES	LTF	PLXNB1	TMPRSS3	KIF20A	ST6GALNAC2	IMPA2	GINS2	CPE	IL17RB	XBP1	TOP2A
GO_INNATE_IMMUNE_RESPONSE	NA	NA	NA	0.280224	NA	782	FYN	KLRK1	TRGV3	CD96	KLRC4-KLRK1	IL18RAP	KLRD1	CD160	SLAMF6	CRTAM	NLRC5	MUC21	MCOLN2	TXK	PYHIN1	STAT5B	MAP4K2	CLNK	CD84	GBP4	HLA-DQA1	HLA-DRB5	BLK	CLEC10A	PTPN22	NLRC3	IRF8	SP100	TRGV4	EVL	CFP	TBKBP1	NCR1	APOBEC3D	KLRG1	CARD11	RASGRP1	IRAK4	SH2D1A	MPEG1	RNF166	ZAP70	SLAMF1
Pval: enrichment p-value, padj: Benjamini Hochberg adjusted P-value, log2err: expected error for the standard deviation of the P-value logarithm, ES: Enrichement score, NES: Normalized enrichement score, Size: size of pathway after removing genes not present pathway
[truncated: 160 more columns]

## Sheet: S6
Supplemental Table S6. Differential enrichment analyses in post-neoadjuvant immunotherapy tumors for the gene expression program KEGG Antigen Processing and Presentation.
Gene	CGLU219	CGLU249	CGLU218	CGLU352	CGLU279	CGLU390	CGLU250	CGLU220	CGLU256
NFYC	-0.0287185	0.129986	-0.0668032	0.142145	-0.126236	0.316281	0.515044	0.374592	0.30929
HLA-F	0	0	0	0	0	0	0	0	0
HLA-C	-0.267952	-0.0209942	-0.19723	0.0106661	0.751964	0.275331	0.621212	0.846334	1.96895
CTSB	-1.21873	0.0729165	0.208724	-0.962734	1.57322	0.37311	1.32021	0.854745	1.68088
KIR3DL2	0	0	0	0	0	0	0	0	0
HLA-DMA	-0.0677085	0.215882	-0.0999074	-0.460144	2.37732	1.61239	1.55432	0.56507	3.68026
HLA-DOB	0	0	0	0	0	0	0	0	0
CD4	-0.507943	-0.303806	0.139803	-0.525752	3.53475	0.939314	1.40581	2.50076	3.05684
HLA-DMB	0	0	0	0	0	0	0	0	0
HLA-E	0.0920924	0.574443	-0.293932	0.0554609	1.79242	1.28281	0.999586	0.710187	3.38252
LTA	0	0	0	0	0	0	0	0	0
KLRD1	0.934987	-0.620494	-0.0626905	1.31334	2.43043	-0.129198	3.1062	3.09136	3.61084
B2M	-0.698784	0.0226252	0.0991406	-0.487372	0.932594	-0.209819	0.97962	0.689845	2.33047
LGMN	0.151267	0.240758	0.130869	0.428413	1.07812	0.770828	1.72787	0.423887	0.799156
HLA-B	0	0	0	0	0	0	0	0	0
CD8B	1.13752	-1.26341	-0.5665	1.22088	1.44406	-0.436141	2.06352	2.85417	3.09263
CTSS	-0.453246	0.502061	0.607485	-1.26873	1.94333	-0.472342	2.27445	1.88332	3.75146
HLA-DPB1	0	0	0	0	0	0	0	0	0
CIITA	-0.054404	-0.278488	-0.332454	-0.543096	2.76162	1.15849	0.700554	0.735882	3.44712
TAP2	-1.03806	-0.238539	0.55153	0.0711552	1.39467	0.671438	-0.0229247	1.05465	2.81779
KIR3DL1	0.278032	-0.410254	-0.841929	0.297612	0.644165	0.216406	1.35798	-0.0274354	0.559126
HLA-A	-0.725056	-0.144022	-0.770695	0.347638	0.848438	0.716792	0.00339922	-0.0089481	2.2158
CD8A	0.736267	-1.13112	-0.109204	1.80716	2.92643	-0.30803	2.31808	3.61298	3.80607
PSME1	-0.354636	-0.173668	0.102618	0.559556	-0.11668	-0.279365	0.298837	1.08228	0.562579
HLA-DQA2	0	0	0	0	0	0	0	0	0
TAP1	-1.5054	-0.301476	0.166477	0.508085	0.639587	-0.0144471	-0.306237	1.00918	3.26818
PSME3	-1.06612	-0.0934138	0.529271	-0.0771555	-0.432197	-0.674876	-0.534612	-0.411694	-0.70502
HSP90AB1	-0.596026	0.0831126	-0.0260573	0.618424	-0.447116	-0.359003	-1.25109	-0.712459	-0.351167
CANX	-0.215545	-0.240907	0.247185	-0.0136697	-0.247011	-0.819149	-0.217857	-1.10563	-0.373843
HSPA4	-0.16295	-0.322831	0.396268	0.230578	-0.327322	-0.509739	-0.172289	-0.722754	-1.13378
Fold change values for differential enrichment in pre and post neoadjuvant immunotherapy

## Sheet: S7
Supplemental Table S7. Differential enrichment in post-neoadjuvant immunotherapy tumors for innate immunity gene expression programs.
Gene	CGLU352	CGLU219	CGLU249	CGLU218	CGLU279	CGLU390	CGLU250	CGLU256	CGLU220
LEAP2	-0.0154697	0.0509503	-0.0470043	-0.29013	0.200809	0.588565	0.606538	0.446391	0.402918
MAP3K14	0.632933	-0.0483194	-0.458766	-0.58862	0.103193	1.18124	0.875784	1.78251	1.88256
ATP6V0D2	-1.95415	-1.47946	0.342062	0.630481	0.568724	1.84922	2.23142	2.25063	3.73515
CHIT1	-1.01081	-0.465552	0.360275	-0.705048	2.85463	4.30415	3.92628	4.79925	7.86251
CTSZ	0.075189	-0.170055	0.301374	0.18811	0.28835	0.861757	1.18772	1.37519	1.81822
MS4A2	-0.449439	0.572322	-0.588866	0.440274	0.453311	1.17288	0.849698	1.86001	1.7616
TREX1	0.118504	-0.460008	-0.190475	0.173168	-0.843562	0.208854	0.690196	0.938344	0.825338
SIGLEC15	-0.758382	-1.09988	-0.318333	0.251654	-0.797071	0.673841	1.48961	0.777099	2.35328
MYO9B	-0.340165	0.0814195	-0.395335	0.368603	0.851122	0.892024	1.04684	1.54338	2.02351
ELANE	0	-0.1342	0.373976	-0.116597	0.304678	0.71516	0.297205	0.666596	0.558727
RAP1A	-0.610508	0.242738	0.197341	0.198284	0.17937	0.314314	0.9454	0.708605	0.94424
IKBKB	-0.0628296	-0.121948	0.00961889	-0.0961922	0.136557	1.27601	0.43625	1.19039	0.643286
RIPK3	-0.0440085	-0.19981	0.076095	0.638883	0.102602	0.458003	0.584582	1.15462	1.03035
RNF125	-0.243513	0.407839	-0.476926	-0.555817	0.848892	0.611459	1.69661	2.80869	2.00732
ATG7	-0.387407	-0.174594	-0.147432	0.414321	0.557864	0.377965	0.608077	0.936197	0.870598
TRPM2	-0.0616935	0.104805	-1.03229	0.567745	0.443143	1.05742	0.492546	2.16788	1.69738
TREM2	-1.55507	-1.47544	0.785297	-0.129213	1.83109	1.16881	2.45721	2.56502	1.9657
PTPRB	0.151331	0.855122	0.70562	-1.15616	3.20409	2.98197	3.18762	3.48879	2.6616
MAN2B1	-0.209592	0.0148769	-0.616183	-0.0243739	1.25442	0.496843	1.25998	1.40251	1.41785
FUCA1	-0.493192	0.789734	0.00381209	-0.63377	0.0857793	1.20805	2.25448	0.707381	0.746475
FAF2	-0.0316651	-0.313712	0.0133725	0.338051	-0.311837	-0.26705	-0.676677	-0.458137	-0.891479
TMEM30A	0.170005	0.011456	0.138426	0.0564434	0.600123	-0.0405262	-0.638702	-0.547816	-1.05361
UBE2K	-0.48741	-0.142436	0.0349444	0.712609	0.539026	-0.665168	-0.361937	-1.09199	-0.869618
WASL	0.000898807	-0.321916	0.347287	0.443478	-0.4827	-1.01732	-0.653803	-1.63484	-1.92361
QPCT	0.0155642	-1.17603	0.317399	0.638095	0.177399	-1.76925	-0.780129	-2.2937	-1.35787
SAA1	1.28709	2.16548	1.15285	1.38011	2.94375	0.222994	0.599051	0.0962677	0.193088
PYGB	0.627049	-0.169301	0.458159	-0.0947995	-0.0648132	-0.582097	-2.17238	-1.81489	-1.71882
CPNE3	-0.0407574	-0.0737419	0.111724	-0.0773543	0.260171	-0.615405	-0.331268	-0.624978	-0.356256
HGSNAT	0.0455544	0.592351	0.0995275	0.0706748	0.576079	-0.934355	-1.08529	-0.366832	-1.05145
CD46	0.101703	-0.0733092	0.602329	-0.140106	0.533083	-0.783411	-0.762999	-0.705084	-1.25156
Fold change values for differential enrichment in pre and post neoadjuvant immunotherapy

## Sheet: S8
Supplemental Table S8. Differential enrichment in post-neoadjuvant immunotherapy tumors for the Interferon Gamma Response gene expression program.
Gene	CGLU352	CGLU249	CGLU219	CGLU218	CGLU279	CGLU390	CGLU250	CGLU220	CGLU256
SELP	0.1165	-0.755017	1.28157	-1.69027	1.22886	1.62576	1.37284	3.69197	3.53737
PTPN1	0.215072	0.676636	-0.0624103	0.166716	0.87312	0.79834	0.796101	0.919177	1.15756
RIPK1	-0.409357	0.0430017	0.228468	0.0853213	-0.342904	0.95885	0.355944	0.223239	0.322055
IRF5	-0.539976	0.00934651	-0.615761	0.110251	0.97842	0.238395	0.810288	0.961843	1.66856
NLRC5	-0.140532	-0.642497	-1.0255	0.11361	1.42815	0.628892	0.845335	2.53635	3.6598
TXNIP	-0.768051	0.917617	0.910037	-0.496311	1.19843	0.762222	1.37638	1.35878	2.2877
IRF8	-1.22863	-0.65973	0.495119	-0.17568	1.17508	0.492001	1.18169	4.72648	3.94544
TRIM14	-0.326669	-0.0764392	-0.428117	0.388825	0.336032	-0.001957	0.72401	0.85243	0.388344
ZBP1	-0.05928	-2.08014	0.876866	-0.204177	0.947575	-0.0766231	1.00024	3.11247	2.78848
XCL1	0.687653	-0.543578	0.0173182	-0.597362	-2.01735	-0.583442	0.901515	1.20275	1.12291
CD69	-1.45792	2.34314	1.56563	0.740034	3.26951	1.70943	2.81739	3.72344	5.76592
IFNAR2	0.094598	-0.868489	0.0430009	0.165077	-0.360803	0.301725	-0.221073	0.648474	1.02496
IL18BP	-0.44811	-0.600987	0.0329744	-0.0943413	2.2393	0.744513	0.679662	2.38046	1.81189
HLA-DMA	-0.460144	0.215882	-0.0677085	-0.0999074	2.37732	1.61239	1.55432	0.56507	3.68026
XAF1	-0.141309	-0.317258	-0.68999	0.990185	0.287147	1.57418	-0.483171	1.93439	2.87455
KLRK1	1.28455	-0.841726	1.22248	-0.366064	3.67246	0.621058	2.8439	3.90907	5.3543
PTPN6	-0.404189	-0.517128	-0.701723	-0.0510591	0.139472	-0.503008	0.568809	2.03582	0.806335
TNFAIP3	-0.413172	1.4663	0.803846	1.22895	2.84972	1.66232	1.3867	2.86838	4.2538
BTG1	0.354985	0.405621	0.393714	0.132257	0.0932033	-0.294884	1.97153	2.81181	1.5476
IL15RA	0.260932	0.0787788	-0.0937502	0.395719	0.552976	1.40302	0.163468	0.530357	2.05739
IRF9	0.0427869	-0.238929	-0.384679	0.414287	-0.354505	-0.189825	0.136107	2.05108	1.60355
GPR18	0.0468036	-2.83108	0.206096	-1.41929	0.730372	-1.13615	0.715055	4.13017	2.12184
RTP4	-0.12138	-0.582493	-0.983379	0.0395895	-0.927803	-0.5306	0.0087594	0.11605	1.44894
B2M	-0.487372	0.0226252	-0.698784	0.0991406	0.932594	-0.209819	0.97962	0.689845	2.33047
ISG20	-0.241677	-0.26157	1.11638	0.252098	-0.954389	-0.877687	1.40879	2.84946	3.25618
GBP6	-1.39806	0.447922	-1.129	-0.70019	0.506889	-2.0793	-1.42779	-1.61736	-0.182901
BPGM	0.0149187	-0.0591464	-0.0560308	0.372099	0.297934	-0.950973	0.359059	-1.26663	-0.412677
LGALS3BP	0.491142	0.328858	-0.357736	0.172429	-0.479926	-0.251024	-1.07687	-2.4648	-0.639666
NAMPT	-0.42853	2.16328	0.201346	2.38929	1.78279	-0.0571309	-1.17602	-1.91737	0.955976
HIF1A	-0.374045	-0.510596	0.248057	0.983425	0.810189	-0.106371	-0.839285	-0.61307	-0.589312
Fold change values for differential enrichment in pre and post neoadjuvant immunotherapy

## Sheet: S9
Supplemental Table S9. TCR-beta Sequencing Analysis
Patient ID	Pre-Treatment Blood Clonality	Pre-Treatment Blood Maximum production Frequency	Pre-Treatment Blood Total Productive Templates	Pre-Treatment Blood Total Unique Productive Clones	On-Treatment Blood clonality	On-Treatment Blood Maximum Production Frequency	On-Treatment Blood Total Productive Templates	On-Treatment Blood Total Unique Productive Clones	Tumor Clonality	Tumor Maximum production Frequency	Tumor Total productive Templates	Tumor Total Unique Productive Clones
CGLU205	0.130413	0.0533326	103989	53219	0.105423	0.0454384	81847	46221	0.0589675	0.0290614	17962	12817
CGLU204	0.0979438	0.0385666	61841	32551	0.110799	0.0455449	66396	32608	0.141073	0.0796912	8420	4044
CGLU223	0.0299167	0.0102326	141117	106086	0.0820493	0.0215841	15428	7932	0.0332102	0.0133908	103952	76316
CGLU224	0.349352	0.254764	177305	63529	0.0425807	0.0827423	423	349	0.313625	0.225922	132338	51789
CGLU264	0.149505	0.0422855	195599	94871	0.193054	0.0642158	206865	93432	0.0744841	0.0254505	12652	6802
CGLU206	0.0373037	0.00707708	44086	27389	0.0906707	0.0286372	63030	33402	0.183593	0.0539212	14243	5603
CGLU221	0.075325	0.0165791	33295	20177	0.0797844	0.0122309	141363	74265	0.128621	0.0575658	3040	1436
CGLU215	0.0802137	0.0130785	512216	233123	0.0556002	0.0146546	160291	96972	0.179073	0.0758621	10150	3430
CGLU222	0.0502465	0.0451383	338006	249115	0.124566	0.0498892	13089	6581	0.026043	0.0195883	163516	131018
CGLU217	0.165944	0.0777644	82107	36476	0.0776878	0.020073	5480	3170	0.0475765	0.016992	79979	53484
CGLU218	0.0331117	0.0100406	153079	114761	0.0247924	0.00906785	108405	86911	0.0493702	0.0186765	6211	4112
CGLU219	0.0641863	0.0452636	26180	18993	0.0678186	0.0472898	40495	28828	0.0301348	0.0276273	1846	1380
CGLU220	0.117415	0.030471	63864	37293	0.122668	0.0406012	89554	47657	0.0673907	0.0744398	2633	1647
CGLU225	0.0177296	0.00272928	81340	66106	0.0224104	0.00320373	63988	50591	0.0308895	0.0232635	3009	2217
CGLU259	0.137008	0.0375996	9415	4191	0.257985	0.117702	95631	40505	0.204917	0.0922327	106730	48531
CGLU279	0.064648	0.0131248	91354	51037	0.0990482	0.0293578	122625	60576	0.0900313	0.0199467	13135	6473

## Sheet: S10
Supplemental Table S10. Genes Analyzed by TEC-Seq
Gene	Region Analyzed	Gene Category	Panel*
ABL1	Specific Exons	Cancer Driver Gene	1
AKT1	Specific Exons	Cancer Driver Gene	1,2
ALK	Full Coding Region	Cancer Driver Gene	1,2
APC	Specific Exons	Cancer Driver Gene	1
AR	Full Coding Region	Cancer Driver Gene	1,2
ATM	Specific Exons	Cancer Driver and Clonal Hematopoiesis Gene	1,2
BRAF	Full Coding Region	Cancer Driver Gene	1,2
BRCA1	Specific Exons	Cancer Driver Gene	2
BRCA2	Specific Exons	Cancer Driver Gene	2
CCND1	Specific Exons	Cancer Driver Gene	2
CCND2	Specific Exons	Cancer Driver Gene	2
CCND3	Specific Exons	Cancer Driver Gene	2
CD274	Full Coding Region	Cancer Driver Gene	2
CDH1	Specific Exons	Cancer Driver Gene	1
CDK4	Full Coding Region	Cancer Driver Gene	1,2
CDK6	Full Coding Region	Cancer Driver Gene	1,2
CDKN2A	Specific Exons	Cancer Driver Gene	1,2
CSF1R	Specific Exons	Cancer Driver Gene	1
CTNNB1	Specific Exons	Cancer Driver Gene	1,2
DNMT3A	Specific Exons	Cancer Driver and Clonal Hematopoiesis Gene	1,2
EGFR	Full Coding Region	Cancer Driver Gene	1,2
ERBB2	Specific Exons	Cancer Driver Gene	1,2
ERBB4	Full Coding Region	Cancer Driver Gene	1
ESR1	Full Coding Region	Cancer Driver Gene	2
EZH2	Specific Exons	Cancer Driver Gene	1,2
FBXW7	Specific Exons	Cancer Driver Gene	1
FGFR1	Specific Exons	Cancer Driver Gene	1,2
FGFR2	Specific Exons	Cancer Driver Gene	1,2
FGFR3	Specific Exons	Cancer Driver Gene	1,2
FLT3	Specific Exons	Cancer Driver Gene	1,2
GNA11	Specific Exons	Cancer Driver Gene	1
GNAQ	Specific Exons	Cancer Driver Gene	1
GNAS	Specific Exons	Cancer Driver and Clonal Hematopoiesis Gene	1,2
HNF1A	Specific Exons	Cancer Driver Gene	1
HRAS	Full Coding Region	Cancer Driver Gene	1,2
IDH1	Specific Exons	Cancer Driver and Clonal Hematopoiesis Gene	1,2
IDH2	Specific Exons	Cancer Driver and Clonal Hematopoiesis Gene	1,2
JAK2	Specific Exons	Cancer Driver and Clonal Hematopoiesis Gene	1,2
JAK3	Specific Exons	Cancer Driver Gene	1
KDR	Specific Exons	Cancer Driver Gene	1
KIT	Full Coding Region	Cancer Driver Gene	1,2
KRAS	Full Coding Region	Cancer Driver Gene	1,2
MAP2K1	Specific Exons	Cancer Driver Gene	1,2
MET	Specific Exons	Cancer Driver Gene	1,2
MLH1	Specific Exons	Cancer Driver Gene	1
MPL	Specific Exons	Cancer Driver Gene	1
MTOR	Specific Exons	Cancer Driver Gene	2
MYC	Specific Exons	Cancer Driver Gene	1,2
MYCN	Specific Exons	Cancer Driver Gene	2
NPM1	Specific Exons	Cancer Driver Gene	1,2
NRAS	Specific Exons	Cancer Driver Gene	1,2
NTRK1	Specific Exons	Cancer Driver Gene	2
NTRK2	Specific Exons	Cancer Driver Gene	2
NTRK3	Specific Exons	Cancer Driver Gene	2
PALB2	Specific Exons	Cancer Driver Gene	2
PDGFRA	Full Coding Region	Cancer Driver Gene	1
PIK3CA	Specific Exons	Cancer Driver Gene	1,2
PIK3CB	Specific Exons	Cancer Driver Gene	2
PIK3R1	Specific Exons	Cancer Driver Gene	1,2
POLD1	Specific Exons	Cancer Driver Gene	2
POLE	Specific Exons	Cancer Driver Gene	2
PTCH1	Specific Exons	Cancer Driver Gene	2
PTEN	Specific Exons	Cancer Driver Gene	1,2
PTPN11	Specific Exons	Cancer Driver Gene	1
RB1	Specific Exons	Cancer Driver Gene	1,2
RET	Specific Exons	Cancer Driver Gene	1,2
RNF43	Specific Exons	Cancer Driver Gene	2
ROS1	Specific Exons	Cancer Driver Gene	2
SMAD4	Specific Exons	Cancer Driver Gene	1
SMARCB1	Specific Exons	Cancer Driver Gene	1
SMO	Specific Exons	Cancer Driver Gene	1
SRC	Specific Exons	Cancer Driver Gene	1
STK11	Full Coding Region	Cancer Driver Gene	1
TERT	Specific Exons	Cancer Driver Gene	2
TP53	Full Coding Region	Cancer Driver Gene	2
TSC1	Specific Exons	Cancer Driver Gene	2
TSC2	Specific Exons	Cancer Driver Gene	2
VHL	Specific Exons	Cancer Driver Gene	1,2
TEC-Seq: Targeted error correction sequencing
* Panel 1 was preciously described in Phallen J., et al., Science Translational Medicine, 2017.
Panel 2 waspreviously described in Anagnostou V., et al., Cancer Research, 2019.

[truncated: 4 more sheets: S11, S12, S13, S14]
